# Supplementary material
Source: PubMed Central journal article supplement (PMC8656175)
Supplement: mmc1.pdf [file mmc1.pdf]

# *Supporting Information*

## **Total Synthesis of Remdesivir**

Kishore Kumar Palli,<sup>a,b</sup> Palash Ghosh,<sup>a,b</sup> Shiva Krishna Avula,<sup>a,b</sup> Sridhara Shanmukha Rao B.,<sup>a,b</sup> Amol D. Patil,<sup>a,b</sup> Subhash Ghosh,<sup>a,b</sup> Gangarajula Sudhakar,<sup>a,b</sup> Chada Raji Reddy,<sup>a,b</sup> Prathama S. Mainkar,<sup>a,b</sup> and Srivari Chandrasekhar\*<sup>a,b</sup>

<sup>a</sup>*Department of Organic Synthesis & Process Chemistry, CSIR-Indian Institute of Chemical Technology (CSIR-IICT), Hyderabad 500007, India.*

<sup>b</sup>*Academy of Scientific and Innovative Research (AcSIR), Ghaziabad 201002, India.*

E-mail: [srivaric@iict.res.in](mailto:srivaric@iict.res.in)

| <b>Table of Contents</b>                                                                                              | <b>Pages</b> |
|-----------------------------------------------------------------------------------------------------------------------|--------------|
| I. General details .....                                                                                              | S-2 to S-2   |
| II. Experimental procedures and analytical data .....                                                                 | S-3 to S-10  |
| III. HPLC data of compounds <b>18</b> , <b>21</b> and Remdesivir ( <b>1</b> , <b>GS-5734</b> ) .....                  | S-11 to S-13 |
| IV. LCMS data of compound <b>18</b> .....                                                                             | S-14 to S-14 |
| V. <sup>1</sup> H NMR & <sup>13</sup> C NMR spectra .....                                                             | S-15 to S-29 |
| VI. Comparison of <sup>1</sup> H and <sup>13</sup> C NMR spectral data of Remdesivir ( <b>1</b> , <b>GS-5734</b> )... | S-30         |
| VII. References.....                                                                                                  | S-31         |

## I. General details

**General information:** Unless otherwise noted, all reactions were carried out in flame-dried or oven-dried glassware under a nitrogen atmosphere with magnetic stirring. Commercially available solvents and reagents were used as received without further purification. All solvents were reagent grade or HPLC grade. Tetrahydrofuran (THF) was freshly distilled from sodium/benzophenone, dichloromethane ( $\text{CH}_2\text{Cl}_2$ ) was distilled from calcium hydride under nitrogen atmosphere. Pyrrolo[2,1-*f*][1,2,4]triazin-4-amine **16** was prepared using the literature protocol<sup>1</sup> and D-(+)-Ribono-1,4-lactone (**12**) was purchased from commercial sources. Reactions were monitored by thin-layer chromatography (TLC) silica gel glass plates (60 F<sub>254</sub>). TLC plates were visualized under UV light at 254 nm and *p*-Anisaldehyde stain. Column chromatography was carried out using silica gel (60-120 mesh & 100-200 mesh) packed in glass columns. NMR spectra were recorded at 300, 400, 500 MHz (H) and 75, 101, 126 MHz (C), respectively. Chemical shifts ( $\delta$ ) are reported in ppm, using the residual solvent peak in  $\text{CDCl}_3$  (H:  $\delta = 7.26$  and C:  $\delta = 77.16$  ppm),  $\text{DMSO-}d_6$  (H:  $\delta = 2.50$  and C:  $\delta = 39.00$  ppm) and  $\text{methanol-}d_4$  (H:  $\delta = 3.31$  and C:  $\delta = 49.00$  ppm) as internal standard. Data are reported as follows: chemical shift, multiplicity (s = singlet, d = doublet, t = triplet, q = quartet, dd = doublet of doublets, m = multiplet, brs = broad singlet, app = apparent), coupling constants (J) in (Hz), integration. Phosphorus-31 nuclear magnetic resonance spectra are reported in parts per million on the  $\delta$  scale. Data is reported as follows: chemical shift [multiplicity (s = singlet, d = doublet, t = triplet), coupling constants (J) in Hertz. Purities of the final compounds were determined by high-performance liquid chromatography (HPLC) and were greater than 95% unless otherwise noted. HPLC conditions to assess purity were as follows: waters alliance (system), Lunar C18,  $250 \times 4.6$  mm column; 2-98% gradient of 0.1% trifluoroacetic acid in water and 0.1% trifluoroacetic acid in acetonitrile; flow rate, 1 mL/min; acquisition time, 25 min; wavelength, 254 nm. Specific Optical rotations were recorded on an Anton Paar Polarimeter at 589 nm and reported as follows:  $[\alpha]_D^{20}$ , concentration (*c* in g/100 mL), and solvent. Infrared spectra were recorded on a Bruker Alpha spectrophotometer. HRMS spectra were recorded by using ESI-TOF techniques.

## II. Experimental procedures and analytical data

**(3*R*,4*S*,5*R*)-5-(((*tert*-Butyldiphenylsilyl)oxy)methyl)-3,4-dihydroxydihydrofuran-2(3*H*)-one (13)<sup>2</sup>:**

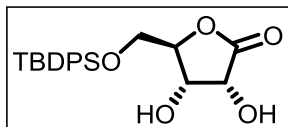

Compound **13** was prepared (10 g, 84% yield) as a white solid. According to a previously established protocol, analytical data were consistent with data previously reported literature. m.p.= 94–96 °C;  $[\alpha]_D^{20} = +48.80^\circ$  ( $c = 0.5$  in  $\text{CHCl}_3$ );  $^1\text{H NMR}$  (400 MHz,  $\text{CDCl}_3$ ):  $\delta$  7.64 – 7.58 (m, 4H), 7.47 – 7.37 (m, 6H), 4.87 – 4.78 (m, 1H), 4.52 – 4.50 (m, 2H), 3.91 (dd,  $J = 11.9, 2.8$  Hz, 1H), 3.80 (dd,  $J = 11.9, 2.0$  Hz, 1H), 3.51 (d,  $J = 4.2$  Hz, 1H), 3.18 (s, 1H), 1.03 (s, 9H);  $^{13}\text{C NMR}$  (101 MHz,  $\text{CDCl}_3$ ):  $\delta$  176.7, 135.7, 135.6, 132.4, 131.9, 130.3, 128.2, 85.6, 70.3, 69.4, 63.5, 26.9, 19.3; **IR** (neat):  $\nu_{\text{max}}$  3400, 2956, 2935, 2862, 1781, 1466, 1428, 1182, 1112, 974, 938, 706  $\text{cm}^{-1}$ ; **HRMS** (ESI-TOF):  $m/z$   $[\text{M}+\text{H}]^+$  calcd for  $\text{C}_{21}\text{H}_{27}\text{O}_5\text{Si}$ : 387.1621; found: 387.1624.

**(3*R*,4*R*,5*R*)-5-(((*tert*-Butyldiphenylsilyl)oxy)methyl)-3,4-bis(((*E*)-prop-1-en-1-yl)oxy)dihydrofuran-2(3*H*)-one (15):**

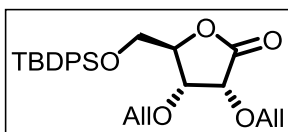

To a stirred solution of (3*R*,4*S*,5*R*)-5-(((*tert*-butyldiphenylsilyl)oxy)methyl)-3,4-dihydroxydihydrofuran-2(3*H*)-one **13** (10.0 g, 25.89 mmol, 1 equiv) in dry THF (100 mL) was added allyl *tert*-butyl carbonate **14** (12.3 g, 77.74 mmol, 3 equiv). The reaction mixture was degassed with argon for 15 min,  $\text{Pd}(\text{PPh}_3)_4$  (598 mg, 0.51 mmol, 0.02 equiv) was added and again degassed with argon for 10 min, The reaction mixture was refluxed for 3h. Then again allyl *tert*-butyl carbonate **14** (8.2 g, 51.83 mmol, 2 equiv) was added at room temperature. Further, the reaction mixture was refluxed for 3 h. After completion of reaction, monitored by TLC, the solvent was removed by vacuum distillation. The crude residue was purified by silica gel column chromatography eluting with 0–20% ethyl acetate in hexanes to afford compound **15** (10.8 g, 89% yield) as a colorless oil.  $R_f = 0.5$  (ethyl acetate/hexane 1:4);  $[\alpha]_D^{20} = +37.30^\circ$  ( $c = 1.0$  in  $\text{CHCl}_3$ );  $^1\text{H NMR}$  (400 MHz,  $\text{CDCl}_3$ ):  $\delta$  7.64 – 7.60 (m, 4H), 7.48 – 7.38 (m, 6H), 6.00 –

5.85 (m, 2H), 5.39 – 5.18 (m, 4H), 4.52 (d,  $J = 5.7$  Hz, 1H), 4.47 (dd,  $J = 4.0, 2.5$  Hz, 1H), 4.41 (ddt,  $J = 12.9, 5.3, 1.3$  Hz, 1H), 4.30 – 4.18 (m, 3H), 4.09 (ddt,  $J = 12.8, 5.8, 1.3$  Hz, 1H), 3.90 (dd,  $J = 11.8, 3.0$  Hz, 1H), 3.76 (dd,  $J = 11.8, 2.3$  Hz, 1H), 1.05 (s, 9H);  $^{13}\text{C}$  NMR (101 MHz,  $\text{CDCl}_3$ ):  $\delta$  173.9, 135.7, 135.6, 134.1, 133.8, 132.6, 132.0, 130.3, 128.1, 118.7, 118.0, 83.0, 75.5, 74.3, 72.1, 71.6, 63.3, 27.0, 19.3; **IR** (neat):  $\nu_{\text{max}}$  3072, 2934, 2860, 1787, 1466, 1427, 1108, 996, 932, 821, 704  $\text{cm}^{-1}$ ; **HRMS** (ESI-TOF):  $m/z$   $[\text{M}+\text{NH}_4]^+$  calcd for  $\text{C}_{27}\text{H}_{38}\text{NO}_5\text{Si}$ : 484.2513; found: 484.2490.

***tert*-Butyl (7-bromopyrrolo[2,1-*f*][1,2,4]triazin-4-yl)carbamate (**16**)<sup>3</sup>:**

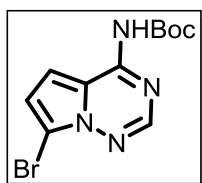

Compound **16** was prepared (6.5 g, 80% yield) as a white solid. According to a previously established protocol, analytical data were consistent with data previously reported literature.  $^1\text{H}$  NMR (400 MHz,  $\text{CDCl}_3$ ):  $\delta$  8.50 (s, 1H), 8.28 (s, 1H), 7.41 (d,  $J = 4.9$  Hz, 1H), 6.90 (d,  $J = 4.9$  Hz, 1H), 1.57 (s, 9H);  $^{13}\text{C}$  NMR (101 MHz,  $\text{CDCl}_3$ ):  $\delta$  151.4, 150.5, 147.1, 116.7, 115.3, 108.3, 103.3, 83.3, 28.3; **IR** (neat):  $\nu_{\text{max}}$  3173, 2985, 1746, 1601, 1537, 1463, 1409, 1243, 1155, 856  $\text{cm}^{-1}$ ; **HRMS** (ESI-TOF):  $m/z$   $[\text{M}+\text{H}]^+$  calcd for  $\text{C}_{11}\text{H}_{14}\text{O}_2\text{N}_4\text{Br}$ : 313.0294; found: 313.0284.

***tert*-Butyl(7-(((3*R*,4*R*,5*R*)-5-(((*tert*-butyldiphenylsilyl)oxy)methyl)-2-hydroxy-3,4-bis(((*E*)-prop-1-en-1-yl)oxy)tetrahydrofuran-2-yl)pyrrolo[2,1-*f*][1,2,4]triazin-4-yl)carbamate (**17**):**

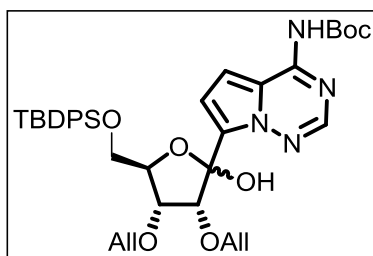

To a stirred solution of *tert*-butyl(7-bromopyrrolo[2,1-*f*][1,2,4]triazin-4-yl)carbamate **16** (2.5 g, 8.01 mmol, 1 equiv) in anhydrous THF (50 mL), pre-cooled to  $-78$   $^{\circ}\text{C}$  was added *n*-BuLi (2.5 M solution in hexane) (9.6 mL, 24.03 mmol, 3.0 equiv) dropwise at  $-78$   $^{\circ}\text{C}$  and stirred for 30 min. A solution of compound **15** (4.85 g, 10.41 mmol, 1.3 equiv) in anhydrous THF (15 mL) was added at  $-78$   $^{\circ}\text{C}$ . The reaction mixture was stirred at same temperature for 3 h. After completion of reaction was

monitored by TLC, quenched with sat.  $\text{NH}_4\text{Cl}$  solution (20 mL), and extracted with ethyl acetate (2 X 50 mL). The organic layer was separated, washed the organics with brine solution (30 mL), dried over sat.  $\text{Na}_2\text{SO}_4$ , filtered and concentrated under reduced pressure. The crude residue was purified by silica gel column chromatography eluting with 0–50% ethyl acetate in hexanes to afford the mixture of isomers (2:1 anomers) **17** (3.2 g, 58% yield) as a yellow solid.  $R_f = 0.2$  (ethyl acetate/hexane 3:7);  $^1\text{H NMR}$  (400 MHz,  $\text{CDCl}_3$ ):  $\delta$  8.36 – 7.95 (s, 1H), 7.72 – 7.60 (m, 4H), 7.43 – 7.33 (m, 6H), 7.15 – 7.00 (m, 2H), 5.97 – 5.64 (m, 2H), 5.33 – 5.14 (m, 3H), 5.05 – 4.78 (m, 3H), 4.40 – 4.29 (m, 1H), 4.26 – 4.16 (m, 2H), 4.01 – 3.95 (m, 3H), 3.84 – 3.79 (m, 1H), 1.57 – 1.55 (s, 9H), 1.07 – 0.99 (s, 9H);  $^{13}\text{C NMR}$  (101 MHz,  $\text{CDCl}_3$ ):  $\delta$  151.1, 149.8, 145.6, 135.8, 135.6, 134.4, 134.2, 134.0, 133.3, 130.5, 129.8, 129.7, 127.8, 119.6, 117.8, 117.5, 113.7, 103.5, 99.9, 82.9, 81.4, 71.9, 71.8, 62.9, 28.1, 26.9, 26.9, 19.3; **IR** (neat):  $\nu_{\text{max}}$  3484, 3257, 3070, 2932, 2861, 1752, 1606, 1511, 1463, 1232, 1145, 1111, 754, 704  $\text{cm}^{-1}$ ; **HRMS** (ESI-TOF):  $m/z$   $[\text{M}+\text{H}]^+$  calcd for  $\text{C}_{38}\text{H}_{49}\text{N}_4\text{O}_7\text{Si}$ : 701.3365; found: 701.3343.

***tert*-Butyl(7-((2*R*,3*R*,4*R*,5*R*)-5-(((*tert*-butyldiphenylsilyl)oxy)methyl)-2-cyano-3,4-bis(((*E*)-prop-1-en-1-yl)oxy)tetrahydrofuran-2-yl)pyrrolo[2,1-*f*][1,2,4]triazin-4-yl)carbamate (**18**):**

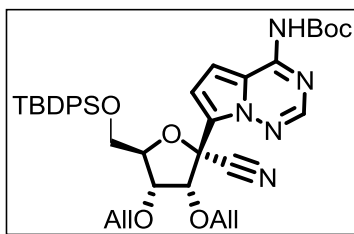

To a solution of *tert*-butyl(7-((3*R*,4*R*,5*R*)-5-(((*tert*-butyldiphenylsilyl)oxy)methyl)-2-hydroxy-3,4-bis(((*E*)-prop-1-en-1-yl)oxy)tetrahydrofuran-2-yl) pyrrolo[2,1-*f*][1,2,4]triazin-4-yl)carbamate **17** (3.0 g, 4.28 mmol, 1 equiv) in dry dichloromethane (50 mL) pre-cooled to  $-78\text{ }^\circ\text{C}$  was added TfoH (0.76 mL, 8.57 mmol, 2 equiv) at  $-78\text{ }^\circ\text{C}$  and stirred for 15 min. After TMSOTf (1.7 mL, 9.41 mmol, 2.2 equiv) was slowly added to the reaction mixture and stirred at same temperature for 30 min. TMSCN (2.1 mL, 17.12 mmol, 4 equiv) was then added slowly and the mixture was stirred at  $-78\text{ }^\circ\text{C}$  for 2 h. After completion of reaction, monitored by TLC, reaction mixture was quenched with triethylamine (4 mL), the reaction mixture was allowed to warm to room temperature. The mixture was diluted with dichloromethane (50 mL), solid sodium bicarbonate (5 g) was then added followed by the slow addition of water (25 mL) and the resulting mixture was stirred for 10 min. The layers were then separated and the aqueous layer was further extracted with  $\text{CH}_2\text{Cl}_2$  (2 X 75 mL). The combined organic extracts were

washed with brine solution (30 mL), dried over anhydrous Na<sub>2</sub>SO<sub>4</sub>, filtered and concentrated under reduced pressure. The crude residue was purified by silica gel column chromatography eluting with 0–30% ethyl acetate in hexanes to afford the product **18** (2.58 g, 85% yield) as a white solid.  $R_f = 0.5$  (ethyl acetate/hexane 1:4); m.p. = 75 °C;  $[\alpha]_D^{20} = +13.70^\circ$  ( $c = 1.0$  in CHCl<sub>3</sub>); <sup>1</sup>H NMR (400 MHz, CDCl<sub>3</sub>):  $\delta$  8.18 (s, 1H), 8.00 (s, 1H), 7.68 – 7.64 (m, 4H), 7.46 – 7.33 (m, 6H), 7.13 (s, 2H), 5.95 – 5.85 (m, 2H), 5.31 – 5.26 (m, 2H), 5.20 – 5.16 (m, 2H), 4.70 (d,  $J = 4.9$  Hz, 1H), 4.47 – 4.42 (m, 2H), 4.33 (dd,  $J = 12.8, 6.5$  Hz, 1H), 4.15 – 3.98 (m, 4H), 3.83 (dd,  $J = 11.8, 3.2$  Hz, 1H), 1.57 (s, 9H), 1.06 (s, 9H); <sup>13</sup>C NMR (101 MHz, CDCl<sub>3</sub>):  $\delta$  151.6, 150.1, 146.2, 135.7, 135.7, 134.2, 134.0, 133.1, 132.9, 130.0, 130.0, 127.9, 125.6, 118.6, 117.7, 117.2, 116.2, 113.7, 105.4, 83.3, 83.1, 79.4, 78.7, 76.0, 72.7, 71.6, 62.2, 28.2, 27.0, 19.4; IR (neat):  $\nu_{\max}$  3272, 3073, 2933, 2863, 1754, 1608, 1539, 1511, 1235, 1147, 1041, 1001, 932, 759, 706 cm<sup>-1</sup>; HRMS (ESI-TOF):  $m/z$  [M+H]<sup>+</sup> calcd for C<sub>39</sub>H<sub>48</sub>N<sub>5</sub>O<sub>6</sub>Si: 710.3368; found: 710.3346; HPLC:  $t_R = 9.413$  min.

**(2R,3R,4R,5R)-2-(4-Aminopyrrolo[2,1-f][1,2,4]triazin-7-yl)-5-(hydroxymethyl)-3,4-bis(((E)-prop-1-en-1-yl)oxy)tetrahydrofuran-2-carbonitrile (19):**

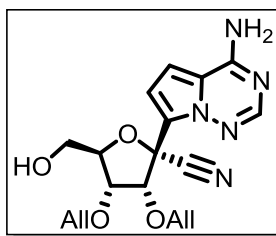

In a Teflon coated vial *tert*-butyl (7-(((2R,3R,4R,5R)-5-(((*tert*-butyldiphenylsilyl)oxy)methyl)-2-cyano-3,4-bis(((*E*)-prop-1-en-1-yl)oxy)tetrahydrofuran-2-yl)pyrrolo[2,1-*f*][1,2,4 ]triazin-4-yl) carbamate **18** (1.5 g, 2.11 mmol, 1 equiv) was dissolved in acetonitrile (20 mL) and 70% HF.py (3 mL) was added with a Teflon syringe at 0 °C. The reaction mixture was allowed to room temperature and stirred for 6 h. After completion of the reaction, monitored by TLC, the reaction mixture was poured into a saturated NaHCO<sub>3</sub> solution (15 mL). After gas evolution subsided, the mixture was extracted with ethyl acetate (2 x 20 mL). The organic layers were combined, and washed with brine solution (10 mL), dried over Na<sub>2</sub>SO<sub>4</sub>, and filtered, concentrated under reduced pressure. The crude residue was purified by silica column chromatography eluting with 0–80% ethyl acetate in hexanes to afford the amino-alcohol **19** (698 mg, 89% yield) as a white solid.  $R_f = 0.3$  (ethyl acetate/hexane 4:1); m.p. = 125 °C;  $[\alpha]_D^{20} = -74.79^\circ$  ( $c = 0.5$  in CHCl<sub>3</sub>); <sup>1</sup>H NMR (500 MHz, CDCl<sub>3</sub>):  $\delta$  7.92 (s, 1H), 7.16 (d,  $J = 4.5$  Hz, 1H), 6.70

(d,  $J = 4.7$  Hz, 1H), 6.00 – 5.93 (m, 3H), 5.54 – 5.46 (m, 1H), 5.40 – 5.36 (m, 1H), 5.24 – 5.22 (m, 1H), 5.00 (d,  $J = 9.4$  Hz, 1H), 4.94 (d,  $J = 5.5$  Hz, 1H), 4.89 (dq,  $J = 7.9, 1.4$  Hz, 1H), 4.87 – 4.86 (m, 1H), 4.53 – 4.52 (m, 1H), 4.36 – 4.33 (m, 1H), 4.30 (dd,  $J = 5.5, 1.6$  Hz, 1H), 4.19 – 4.14 (m, 1H), 3.93 (dd,  $J = 12.7, 1.8$  Hz, 1H), 3.89 – 3.87 (m, 2H), 3.73 (t,  $J = 10.8$  Hz, 1H);  $^{13}\text{C}$  NMR (126 MHz,  $\text{CDCl}_3$ ):  $\delta$  155.9, 147.7, 134.5, 133.4, 123.7, 118.2, 117.6, 117.2, 117.2, 115.0, 100.9, 87.5, 79.9, 79.3, 72.4, 72.1, 63.1;  $^1\text{H}$  NMR (400 MHz,  $\text{DMSO}-d_6$ ):  $\delta$  8.05 – 7.81 (m, 3H), 6.92 (d,  $J = 4.4$  Hz, 1H), 6.88 (d,  $J = 4.2$  Hz, 1H), 5.93 – 5.79 (m, 2H), 5.30 (dd,  $J = 17.3, 1.5$  Hz, 1H), 5.24 – 5.20 (m, 1H), 5.15 – 5.09 (m, 2H), 5.03 – 5.02 (m, 1H), 4.76 (d,  $J = 4.9$  Hz, 1H), 4.27 – 4.17 (m, 3H), 4.11 – 3.98 (m, 3H), 3.66 (d,  $J = 12.2$  Hz, 1H), 3.56 – 3.49 (m, 1H);  $^{13}\text{C}$  NMR (101 MHz,  $\text{DMSO}-d_6$ ):  $\delta$  155.7, 148.0, 134.9, 134.3, 123.0, 117.4, 117.0, 116.8, 116.6, 111.0, 101.0, 84.3, 79.6, 77.6, 76.0, 71.5, 70.5, 60.6; IR (neat):  $\nu_{\text{max}}$  3389, 3328, 3115, 2927, 2876, 1658, 1608, 1529, 1475, 1423, 1266, 1154, 1093, 1050, 931, 748  $\text{cm}^{-1}$ ; HRMS (ESI-TOF):  $m/z$   $[\text{M}+\text{H}]^+$  calcd for  $\text{C}_{18}\text{H}_{22}\text{N}_5\text{O}_4$ : 372.1664; found: 372.1663.

**2-Ethylbutyl ((S)-(perfluorophenoxy)(phenoxy)phosphoryl)-L-alaninate (20)<sup>4</sup>:**

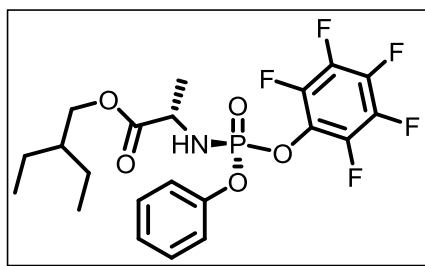

Compound **20** was prepared according to a previously established protocol; analytical data were consistent with data previously reported literature.

$[\alpha]_{\text{D}}^{20} = -0.40^\circ$  ( $c = 0.5$  in  $\text{CHCl}_3$ );  $^1\text{H}$  NMR (500 MHz,  $\text{CDCl}_3$ ):  $\delta$  7.37 – 7.34 (m, 2H), 7.25 – 7.20 (m, 3H), 4.22 – 4.15 (m, 1H), 4.07 (dd,  $J = 5.8, 1.7$  Hz, 2H), 4.01 – 3.97 (m, 1H), 1.52 (dt,  $J = 12.6, 6.3$  Hz, 1H), 1.47 (d,  $J = 7.0$  Hz, 3H), 1.37 – 1.31 (m, 4H), 0.88 (t,  $J = 7.5$  Hz, 3H);  $^{13}\text{C}$  NMR (126 MHz,  $\text{CDCl}_3$ ):  $\delta$  173.2, 150.3, 130.0, 125.8, 120.2, 120.2, 68.0, 50.7, 40.4, 23.3, 21.2, 11.1;  $^1\text{H}$  NMR (500 MHz,  $\text{DMSO}-d_6$ ):  $\delta$  7.42 – 7.39 (m, 2H), 7.26 – 7.21 (m, 3H), 6.89 (dd,  $J = 14.1, 9.9$  Hz) 4.04 – 3.91 (m, 3H), 1.46 – 1.38 (m, 1H), 1.30 – 1.24 (m, 7H), 0.81 (t,  $J = 7.5$  Hz, 3H);  $^{13}\text{C}$  NMR (126 MHz,  $\text{DMSO}-d_6$ ):  $\delta$  172.7, 150.0, 150.0, 129.9, 125.4, 120.1, 120.0, 66.3, 50.2, 22.6, 19.7, 19.6, 10.8;  $^{31}\text{P}$  NMR (202 MHz,  $\text{CDCl}_3$ )  $\delta$  -1.65 (s);  $^{19}\text{F}$  NMR (376 MHz,  $\text{CDCl}_3$ ):  $\delta$  -153.33 (d,  $J = 19.8$  Hz, 2F), -159.56 (t,  $J = 21.7$  Hz, 1F), -162.21 (t,  $J = 20.4$  Hz, 2F). IR (neat):  $\nu_{\text{max}}$  3185, 2968, 1745, 1525, 1266,

1202, 1146, 1024, 952, 775  $\text{cm}^{-1}$ ; **HRMS** (ESI-TOF):  $m/z$   $[\text{M}+\text{H}]^+$  calcd for  $\text{C}_{21}\text{H}_{24}\text{F}_5\text{O}_5\text{NP}$ : 496.1306; found: 496.1312.

**2-Ethylbutyl((S)-(((2R,3R,4R,5R)-5-(4-aminopyrrolo[2,1-f][1,2,4] triazin-7-yl)-5-cyano-3,4-bis((E)-prop-1-en-1-yl)oxy)tetrahydro furan-2-yl)methoxy)(phenoxy)phosphoryl)-L-alaninate (21):**

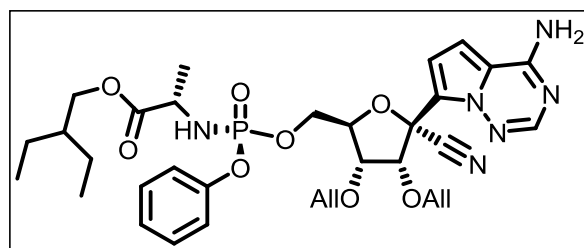

To a stirred solution of amino-alcohol compound **19** (250 mg, 0.673 mmol, 1 equiv) in anhydrous tetrahydrofuran solution (4 mL) was added 1.7 M solution of *tert*-butyl magnesium chloride in THF (1.4 mL, 1.41 mmol, 2.1 equiv) over a period of 3 min at room temperature. The yellow suspension was stirred at this temperature for 30 min, and then was added a solution of 2-ethylbutyl ((*S*)-(perfluoro phenoxy) (phenoxy)phosphoryl)-*L*-alaninate **20** (400 mg, 0.808 mmol, 1.2 equiv) in anhydrous THF (2 mL) over a period of 3 min. The reaction mixture was then allowed to stir at 50 °C for 2 h. After completion of the reaction, monitored by TLC, the reaction was quenched with saturated  $\text{NH}_4\text{Cl}$  solution (4 mL) and extracted with ethyl acetate (2 X 25 mL). The separated organic layer was washed with brine solution (20 mL), dried over anhydrous  $\text{Na}_2\text{SO}_4$ , filtered, and concentrated under reduced pressure. The crude residue was purified by silica gel column chromatography eluting with 0–10% methanol/dichloromethane to afford the product **21** (393 mg, 86% yield) as a yellow sticky solid. There was no other isomer detectable by  $^{31}\text{P}$  or  $^1\text{H}$  NMR. Stereochemistry was assigned as *Sp* on the basis of the known stereochemistry of the compound **20**.  $R_f = 0.6$  (methanol/dichloromethane 1:9);  $[\alpha]_D^{20} = +6.20^\circ$  ( $c = 0.5$  in  $\text{CHCl}_3$ );  $^1\text{H NMR}$  (400 MHz,  $\text{CDCl}_3$ ):  $\delta$  7.99 (s, 1H), 7.33 – 7.29 (m, 2H), 7.23 – 7.21 (m, 2H), 7.16 – 7.14 (m, 1H), 6.96 (d,  $J = 4.5$  Hz, 1H), 6.60 (d,  $J = 4.6$  Hz, 1H), 5.92 – 5.81 (m, 4H), 5.28 (dd,  $J = 7.8, 1.5$  Hz, 1H), 5.23 (dd,  $J = 7.7, 1.5$  Hz, 1H), 5.15 (td,  $J = 10.9, 1.1$  Hz, 2H), 4.82 (d,  $J = 4.9$  Hz, 1H), 4.51 (dd,  $J = 11.1, 4.4$  Hz, 1H), 4.45 – 4.38 (m, 2H), 4.32 – 4.25 (m, 2H), 4.09 – 4.03 (m, 3H), 3.99 – 3.89 (m, 4H), 1.52 – 1.45 (m, 1H), 1.38 (d,  $J = 6.9$  Hz, 3H), 1.33 – 1.25 (m, 4H), 0.85 (t,  $J = 7.4$  Hz, 6H);  $^{13}\text{C NMR}$  (101 MHz,  $\text{CDCl}_3$ ):  $\delta$  173.8, 173.7, 155.4, 150.9, 150.8, 147.5, 133.9, 133.8, 129.9, 125.2, 123.9, 120.3, 120.3, 118.7, 118.0, 116.6, 116.3, 112.8, 100.4, 80.9, 80.9, 79.5, 78.9, 76.6, 72.8,



71.7, 67.8, 65.8, 65.7, 50.4, 40.3, 23.3, 23.3, 21.4, 21.4, 11.1, 11.1;  $^1\text{H NMR}$  (500 MHz, methanol- $d_4$ ):  $\delta$  7.89 (s, 1H), 7.36 – 7.33 (m, 2H), 7.24 – 7.22 (m, 2H), 7.20 – 7.19 (m, 1H), 6.93 (d,  $J = 4.6$  Hz, 1H), 6.88 (d,  $J = 4.6$  Hz, 1H), 5.94 – 5.83 (m, 2H), 5.31 (dq,  $J = 17.3, 1.7$  Hz, 1H), 5.24 (dq,  $J = 17.2, 1.6$  Hz, 1H), 5.17 – 5.14 (m, 1H), 5.12 – 5.09 (m, 1H), 4.94 (d,  $J = 5.0$  Hz, 1H), 4.44 – 4.40 (m, 2H), 4.35 – 4.22 (m, 3H), 4.12 – 4.07 (m, 1H), 4.05 – 3.99 (m, 3H), 3.96 – 3.92 (m, 2H), 1.47 – 1.44 (m, 1H), 1.35 – 1.29 (m, 7H), 0.85 (t,  $J = 7.5$  Hz, 6H);  $^{13}\text{C NMR}$  (101 MHz, methanol- $d_4$ ):  $\delta$  174.9, 174.9, 157.2, 152.2, 152.1, 148.3, 135.5, 135.2, 130.8, 126.2, 124.7, 121.4, 121.4, 118.4, 118.2, 117.7, 117.6, 112.8, 102.6, 82.7, 82.6, 80.5, 80.4, 77.8, 73.6, 72.6, 68.1, 66.7, 66.6, 51.5, 41.7, 24.2, 20.6, 20.5, 11.3, 11.3;  $^{31}\text{P NMR}$  (202 MHz, methanol- $d_4$ ):  $\delta$  3.49 (s); **IR** (neat):  $\nu_{\text{max}}$  3331, 3221, 3189, 2966, 2930, 2881, 1737, 1647, 1602, 1526, 1477, 1250, 1210, 1155, 1033, 938, 769  $\text{cm}^{-1}$ ; **HRMS** (ESI-TOF):  $m/z$   $[\text{M}+\text{H}]^+$  calcd for  $\text{C}_{33}\text{H}_{44}\text{N}_6\text{O}_8\text{P}$ : 683.2954; found: 683.2953; **HPLC**:  $t_{\text{R}} = 7.973$  min.

**Remdesivir (1, GS-5734):**

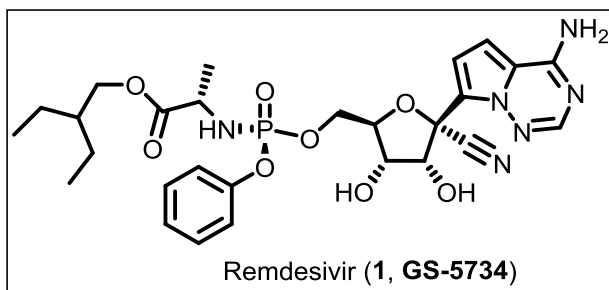

To a stirred solution of compound **21** (200 mg, 0.29 mmol, 1 equiv) in anhydrous THF (3 mL) was added PMHS (200 mg) and degassed with nitrogen for 15 min. Then  $\text{Pd}(\text{PPh}_3)_4$  (17 mg, 0.01 mmol, 0.05 equiv) and  $\text{ZnCl}_2$  (40mg, 0.29 mmol, 1 equiv) was added at room temperature and stirred for 6 h. After completion of the reaction, monitored by TLC, it was quenched with water (5 mL) and stirred for 10 min, extracted with ethyl acetate (2 X 20 mL). The separated organic layer was washed with brine solution (10 mL), dried over anhydrous  $\text{Na}_2\text{SO}_4$ , filtered, and concentrated under reduced pressure. The crude residue was purified by silica gel column chromatography eluting with 0–10% methanol/dichloromethane to afford Remdesivir (**1, GS-5734**) (160 mg, 91% yield) as a white solid.  $R_f = 0.4$  (methanol/dichloromethane 1:9); m.p. = 137 °C;  $[\alpha]_{\text{D}}^{25} = -22.00^\circ$  ( $c = 0.2$  in  $\text{CH}_2\text{Cl}_2$ ), reported  $[\alpha]_{\text{D}}^{25} = -24.00^\circ$  ( $c = 0.2$  in  $\text{CH}_2\text{Cl}_2$ )<sup>5</sup>;  $^1\text{H NMR}$  (400 MHz, methanol- $d_4$ ):  $\delta$  7.87 (s, 1H), 7.33 – 7.26 (m, 2H), 7.21 – 7.12 (m, 3H), 6.91 (d,  $J = 4.6$  Hz, 1H), 6.88 (d,  $J = 4.6$  Hz, 1H), 4.79 (d,  $J = 5.4$  Hz, 1H),

4.43 – 4.34 (m, 2H), 4.28 (ddd,  $J = 10.3, 5.9, 4.2$  Hz, 1H), 4.17 (t,  $J = 5.6$  Hz, 1H), 4.02 (dd,  $J = 10.9, 5.8$  Hz, 1H), 3.96 – 3.85 (m, 2H), 1.49 – 1.41 (m, 1H), 1.35 – 1.27 (m, 8H), 0.85 (t,  $J = 7.5$  Hz, 6H);  $^{13}\text{C}$  NMR (126 MHz, methanol- $d_4$ ):  $\delta$  174.99, 174.94, 157.15, 152.17, 152.12, 148.15, 130.71, 126.06, 125.62, 121.35, 121.31, 117.90, 117.57, 112.33, 102.69, 84.32, 84.25, 81.27, 75.65, 71.63, 68.10, 67.17, 67.13, 51.48, 41.69, 24.22, 24.19, 20.54, 20.49, 11.33, 11.28;  $^{31}\text{P}$  NMR (202 MHz, methanol- $d_4$ ):  $\delta$  3.50 (s); IR (neat):  $\nu_{\text{max}}$  3337, 3222, 2961, 2927, 1732, 1644, 1602, 1525, 1478, 1245, 1207, 1148, 1013, 936, 758, 693  $\text{cm}^{-1}$ ; HRMS (ESI-TOF):  $m/z$   $[\text{M}+\text{H}]^+$  calcd for  $\text{C}_{27}\text{H}_{36}\text{N}_6\text{O}_8\text{P}$ : 603.2326; found: 603.2310; HPLC:  $t_{\text{R}} = 3.542$  min.

### III. HPLC data of compounds 18, 21 and Remdesivir (1, GS-5734):

(a) HPLC data of compound 18

**SHIMADZU**  
**LabSolutions** Analysis Report

**<Sample Information>**

Sample Name : SCS-KK-709  
Sample ID : SCS-KK-709  
Method Filename : KK-250621.lcm

**<Chromatogram>**

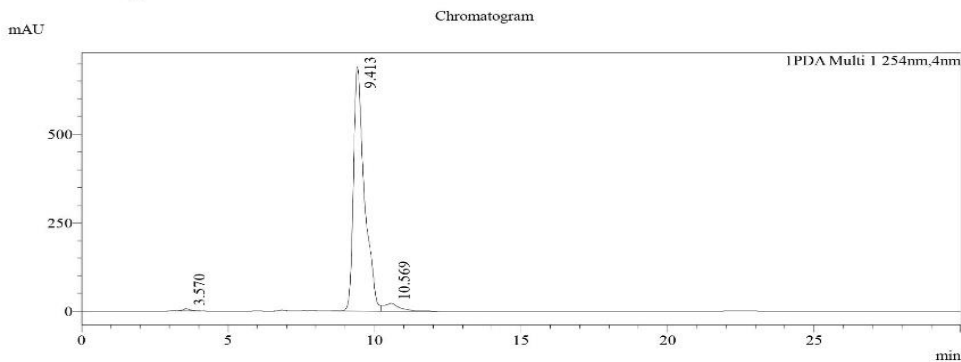

Peak Table

| Peak# | Ret. Time | Area     | Height | Area%   | Height% |
|-------|-----------|----------|--------|---------|---------|
| 1     | 3.570     | 110288   | 6626   | 0.582   | 0.921   |
| 2     | 9.413     | 18023227 | 690688 | 95.128  | 96.036  |
| 3     | 10.569    | 812707   | 21883  | 4.290   | 3.043   |
| Total |           | 18946222 | 719197 | 100.000 | 100.000 |

(b) HPLC data of compound **21**

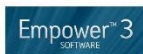

HPLC REPORT

| SAMPLE INFORMATION |                     |                     |                         |
|--------------------|---------------------|---------------------|-------------------------|
| Sample Name:       | 14July21-SCS-KK-682 | Acquired By:        | System                  |
| Sample Type:       | Unknown             | Date Acquired:      | 14-07-2021 15:06:32 IST |
| Vial:              | 2                   | Acq. Method Set:    | corti2021               |
| Injection #:       | 1                   | Date Processed:     | 14-07-2021 17:19:52 IST |
| Injection Volume:  | 10.00 ul            | Processing Method:  | Default                 |
| Run Time:          | 25.0 Minutes        | Channel Name:       | 2998 Ch1 254nm@1.2nm    |
| Sample Set Name:   | 14JULY21            | Proc. Chnl. Descr.: | 2998 Ch1 254nm@1.2nm    |

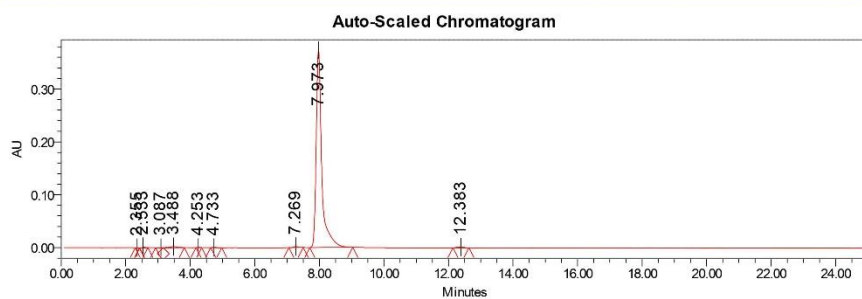

| Peak Results |         |        |        |          |
|--------------|---------|--------|--------|----------|
| RT           | Area    | Height | % Area | % Height |
| 1            | 2335    | 521    | 0.05   | 0.14     |
| 2            | 8379    | 2402   | 0.18   | 0.63     |
| 3            | 4029    | 402    | 0.09   | 0.10     |
| 4            | 32014   | 1985   | 0.70   | 0.52     |
| 5            | 2688    | 540    | 0.06   | 0.14     |
| 6            | 4328    | 410    | 0.09   | 0.11     |
| 7            | 17200   | 1952   | 0.38   | 0.51     |
| 8            | 4482919 | 374162 | 98.06  | 97.55    |
| 9            | 17599   | 1197   | 0.38   | 0.31     |

Reported by User: System  
Report Method: HPLC REPORT  
Report Method ID: 6687  
Page: 1 of 2

Project Name: Chandu  
Date Printed:  
14-07-2021  
17:20:27 Asia/Kolkata

(c) HPLC data of Remdesivir (1, GS-5734)

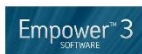

HPLC REPORT

| SAMPLE INFORMATION |                     |                     |                         |
|--------------------|---------------------|---------------------|-------------------------|
| Sample Name:       | 14July21-SCS-KK-602 | Acquired By:        | System                  |
| Sample Type:       | Unknown             | Date Acquired:      | 14-07-2021 15:32:41 IST |
| Vial:              | 3                   | Acq. Method Set:    | corti2021               |
| Injection #:       | 1                   | Date Processed:     | 14-07-2021 17:25:08 IST |
| Injection Volume:  | 10.00 ul            | Processing Method:  | Default                 |
| Run Time:          | 25.0 Minutes        | Channel Name:       | 2998 Ch1 254nm@1.2nm    |
| Sample Set Name:   | 14JULY21            | Proc. Chnl. Descr.: | 2998 Ch1 254nm@1.2nm    |

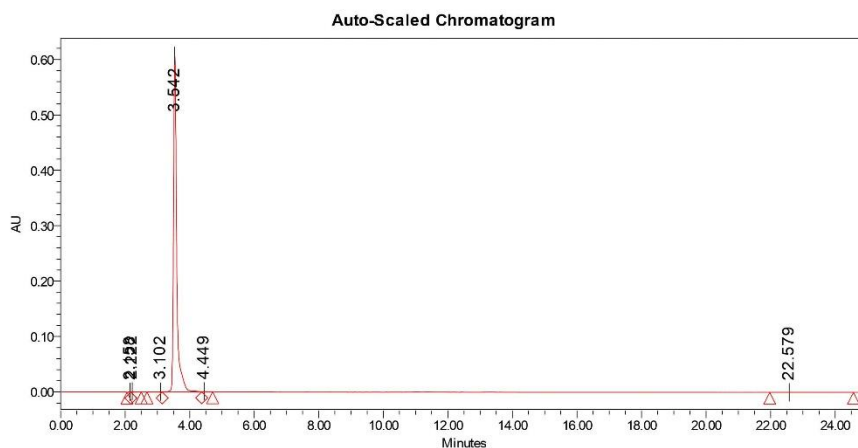

| Peak Results |        |         |        |        |          |
|--------------|--------|---------|--------|--------|----------|
|              | RT     | Area    | Height | % Area | % Height |
| 1            | 2.158  | 3488    | 803    | 0.08   | 0.13     |
| 2            | 2.222  | 9999    | 1389   | 0.24   | 0.23     |
| 3            | 3.102  | 12362   | 642    | 0.30   | 0.10     |
| 4            | 3.542  | 4135116 | 607479 | 98.78  | 99.36    |
| 5            | 4.449  | 8633    | 855    | 0.21   | 0.14     |
| 6            | 22.579 | 16408   | 218    | 0.39   | 0.04     |

Reported by User: System  
Report Method: HPLC REPORT  
Report Method ID: 6699  
Page: 1 of 2

Project Name: Chandu  
Date Printed:  
14-07-2021  
17:29:09 Asia/Kolkata

#### IV. LCMS data of compound 18:

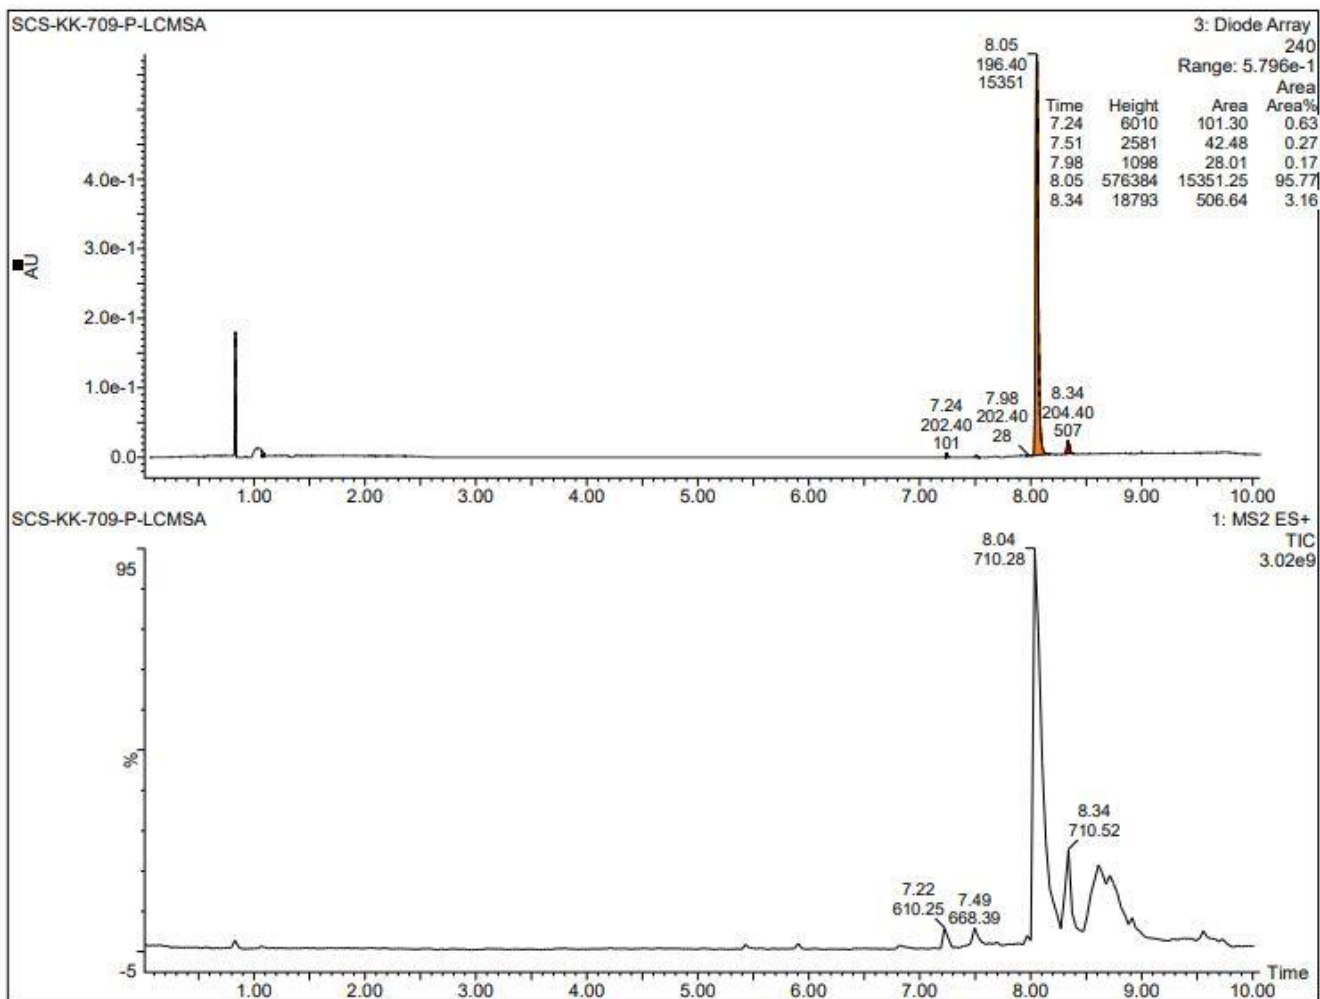

## V. $^1\text{H}$ NMR & $^{13}\text{C}$ NMR spectra

(3*R*,4*S*,5*R*)-5-(((*tert*-butyldiphenylsilyl)oxy)methyl)-3,4-dihydroxydihydrofuran-2(3*H*)-one (13):

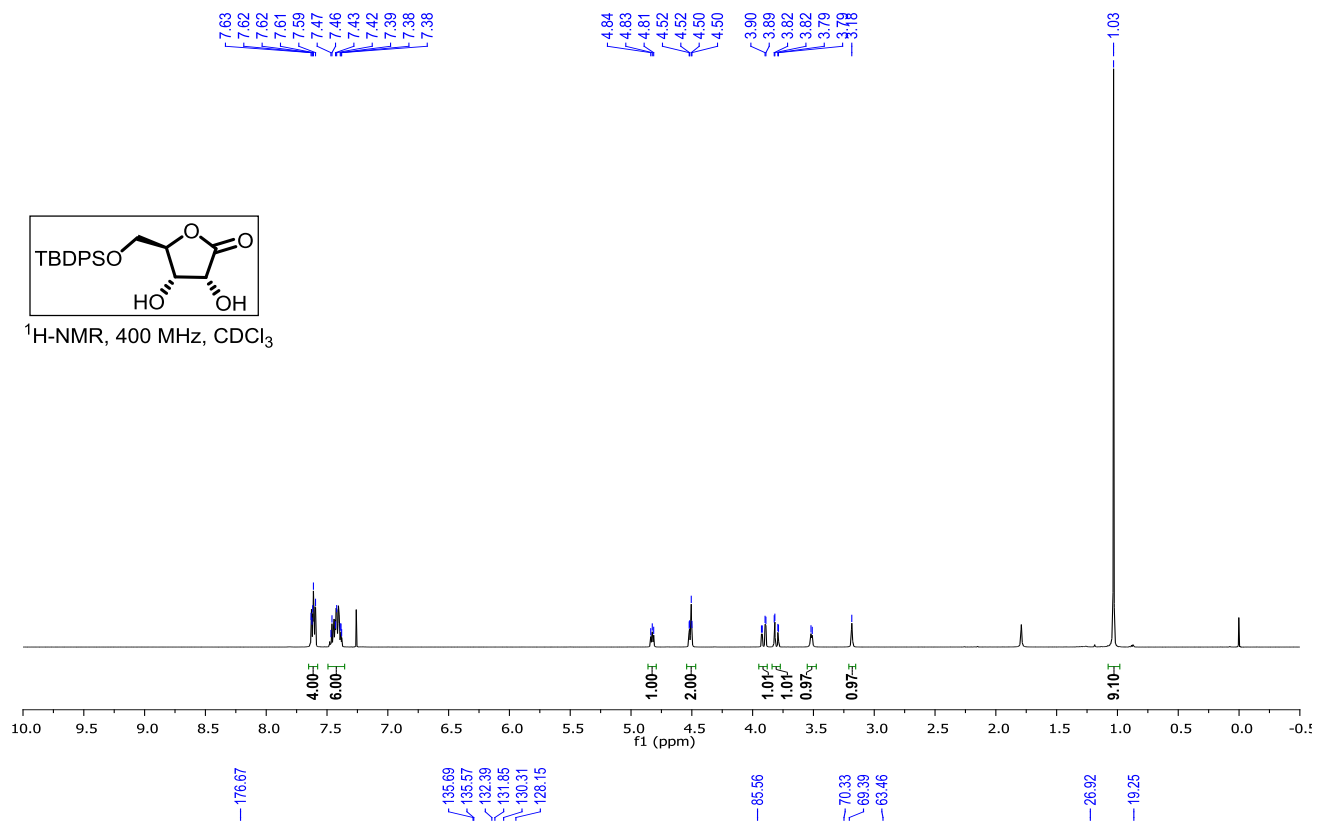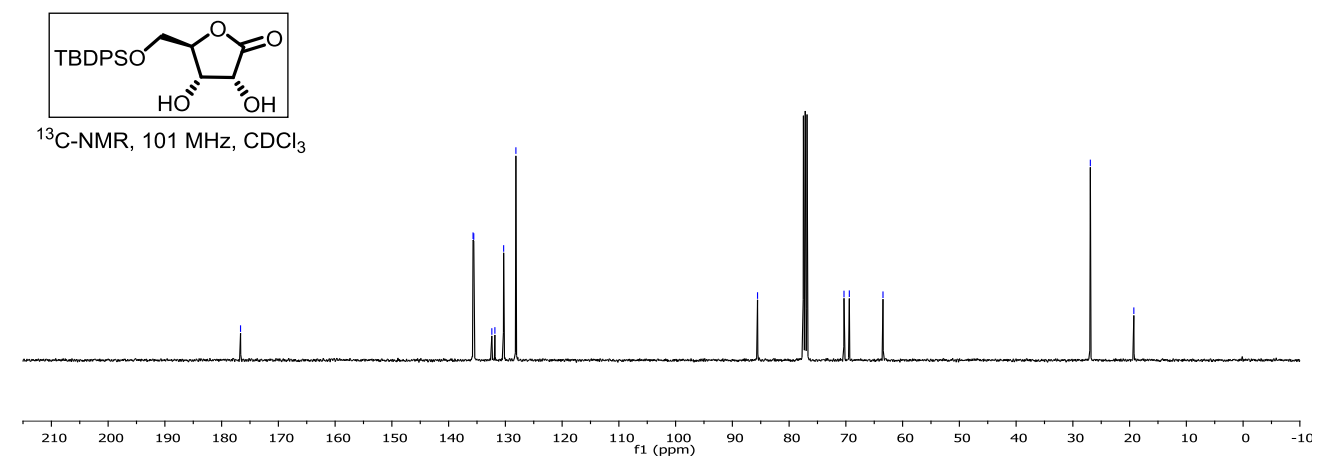

**(3*R*,4*R*,5*R*)-5-(((*tert*-Butyldiphenylsilyl)oxy)methyl)-3,4-bis(((*E*)-prop-1-en-1-yl)oxy)dihydrofuran-2(3*H*)-one (15):**

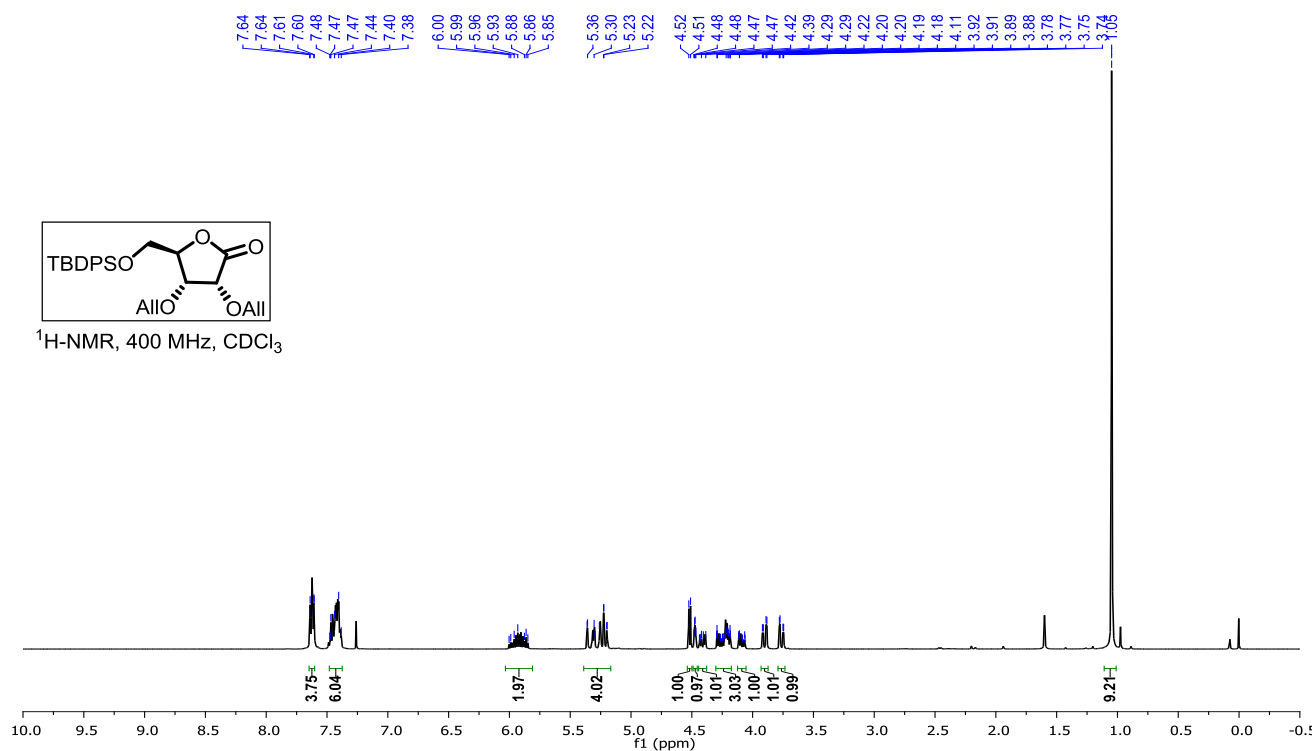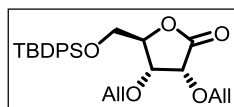

<sup>1</sup>H-NMR, 400 MHz, CDCl<sub>3</sub>

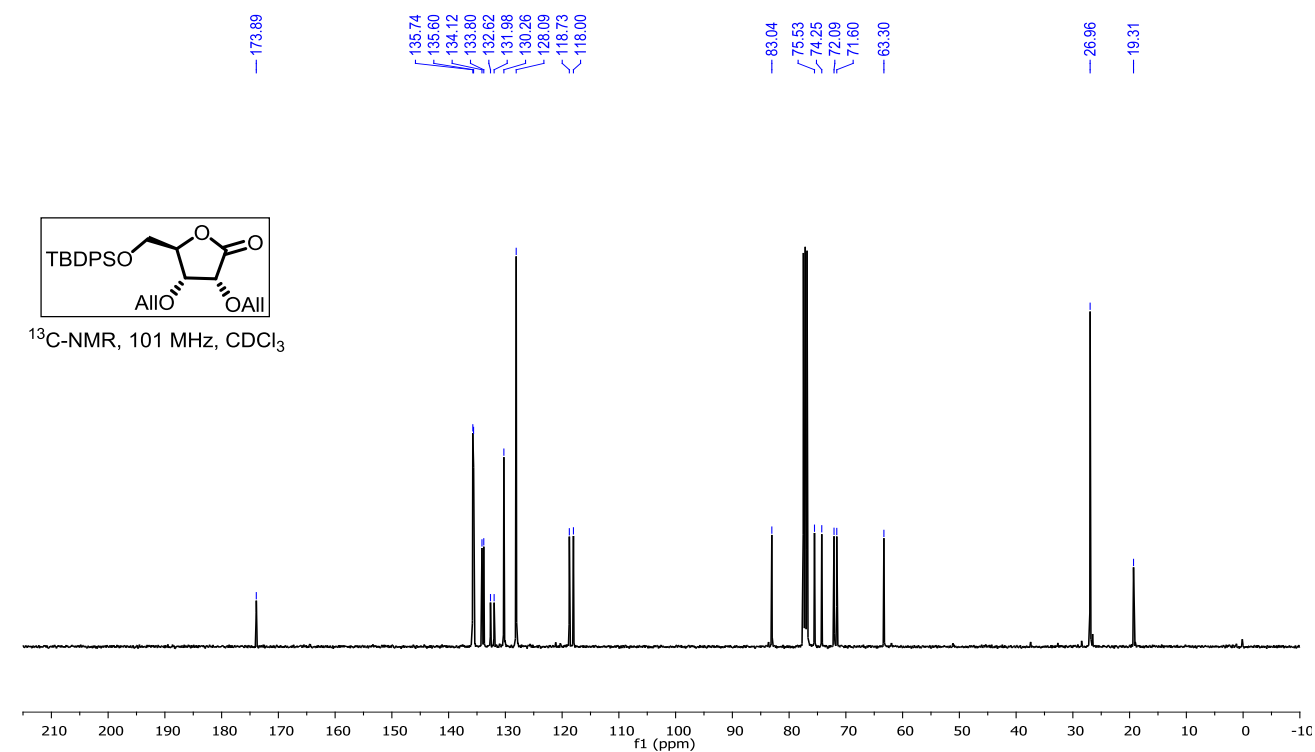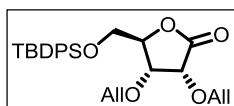

<sup>13</sup>C-NMR, 101 MHz, CDCl<sub>3</sub>



***tert*-Butyl (7-bromopyrrolo[2,1-*f*][1,2,4]triazin-4-yl)carbamate (16):**

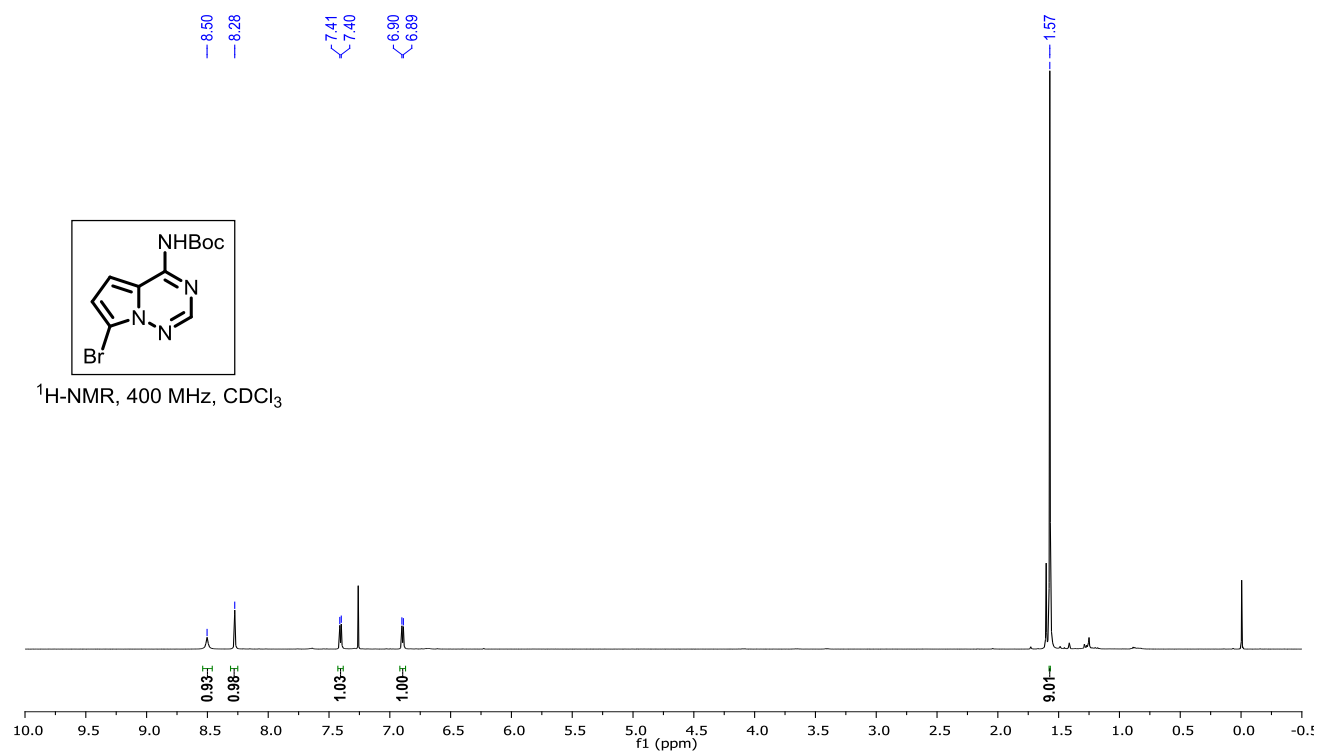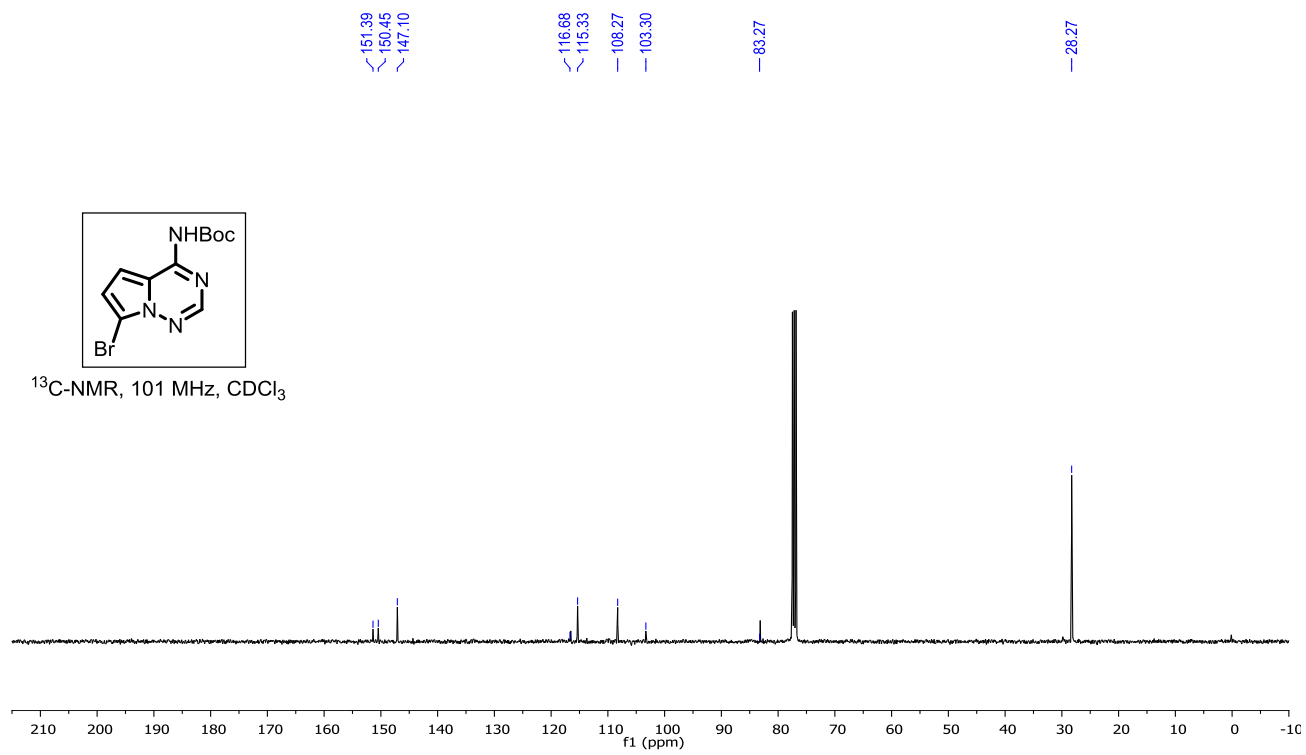

***tert*-Butyl (7-((3*R*,4*R*,5*R*)-5-(((*tert*-butyldiphenylsilyloxy)methyl)-2-hydroxy-3,4-bis(((*E*)-prop-1-en-1-yl)oxy)tetrahydrofuran-2-yl)pyrrolo[2,1-*f*][1,2,4]triazin-4-yl)carbamate (17):**

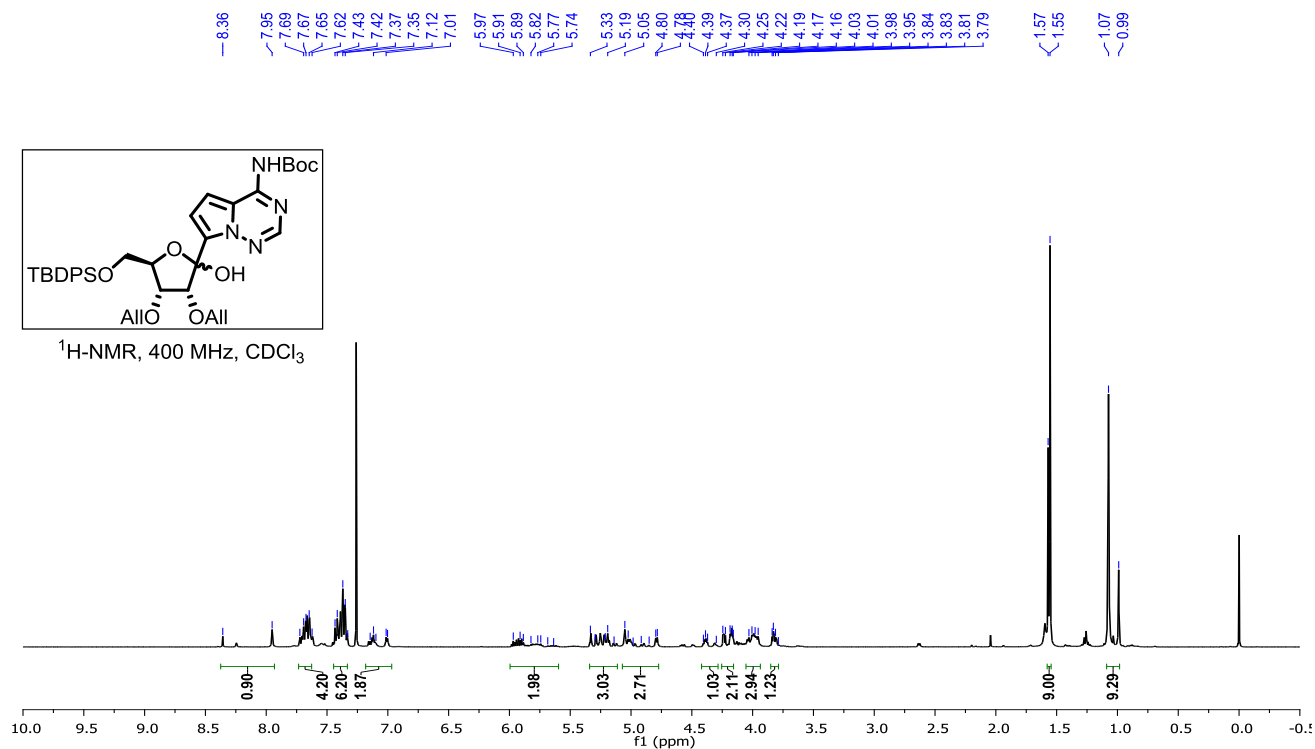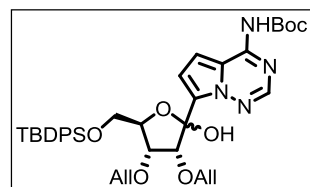

<sup>1</sup>H-NMR, 400 MHz, CDCl<sub>3</sub>

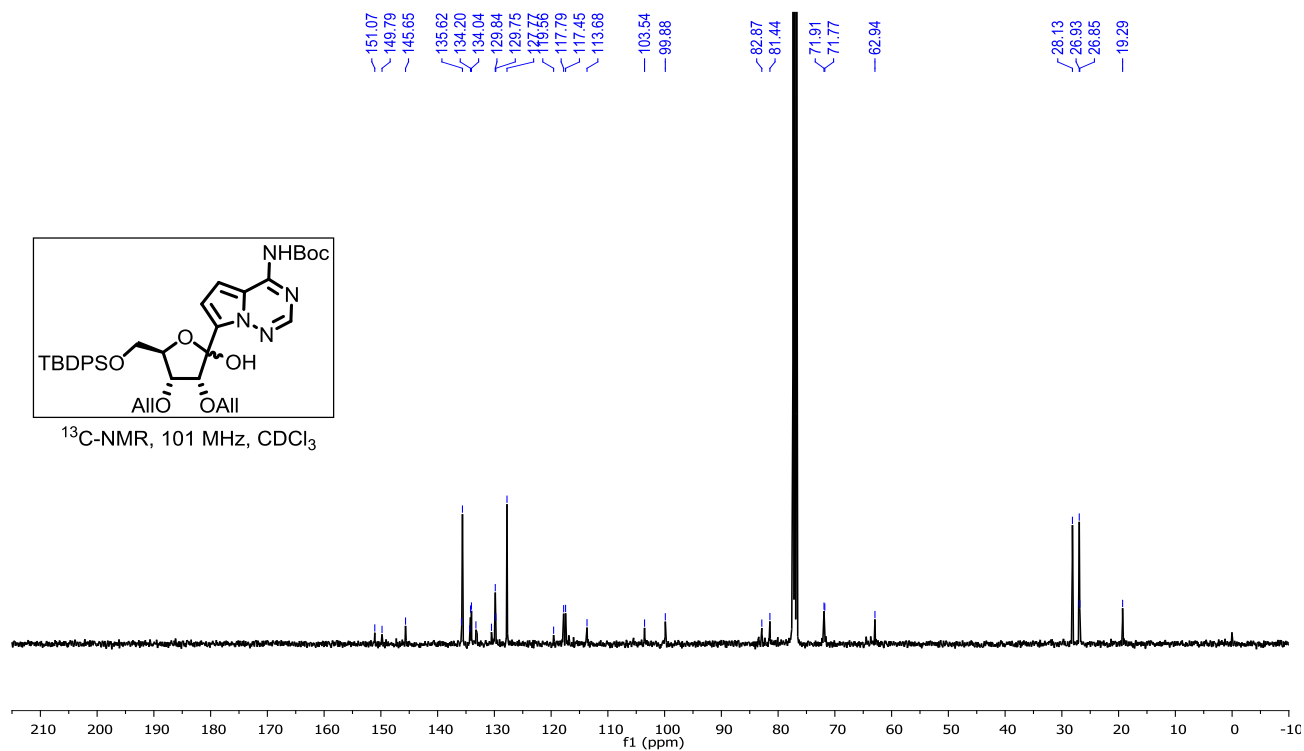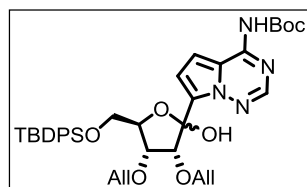

<sup>13</sup>C-NMR, 101 MHz, CDCl<sub>3</sub>

***tert*-Butyl (7-((2*R*,3*R*,4*R*,5*R*)-5-(((*tert*-butyldiphenylsilyl)oxy)methyl)-2-cyano-3,4-bis(((*E*)-prop-1-en-1-yl)oxy)tetrahydrofuran-2-yl)pyrrolo[2,1-*f*][1,2,4]triazin-4-yl)carbamate (18):**

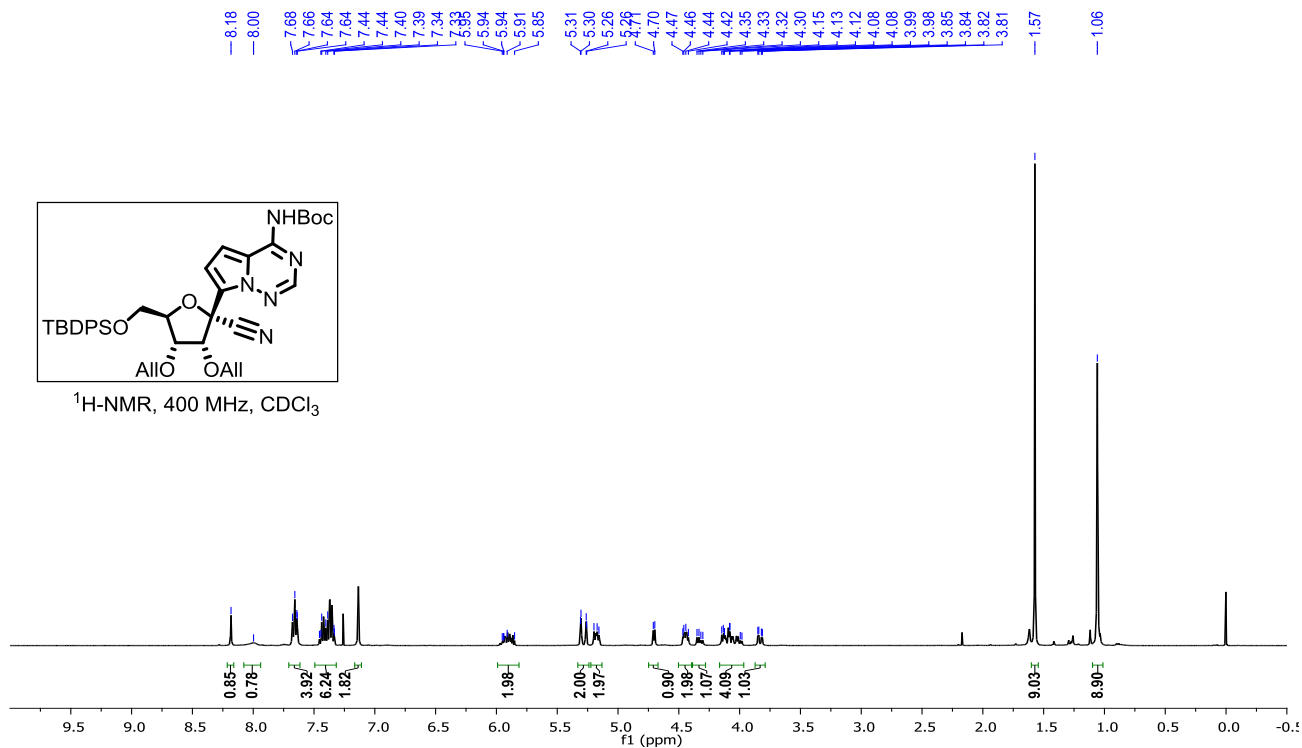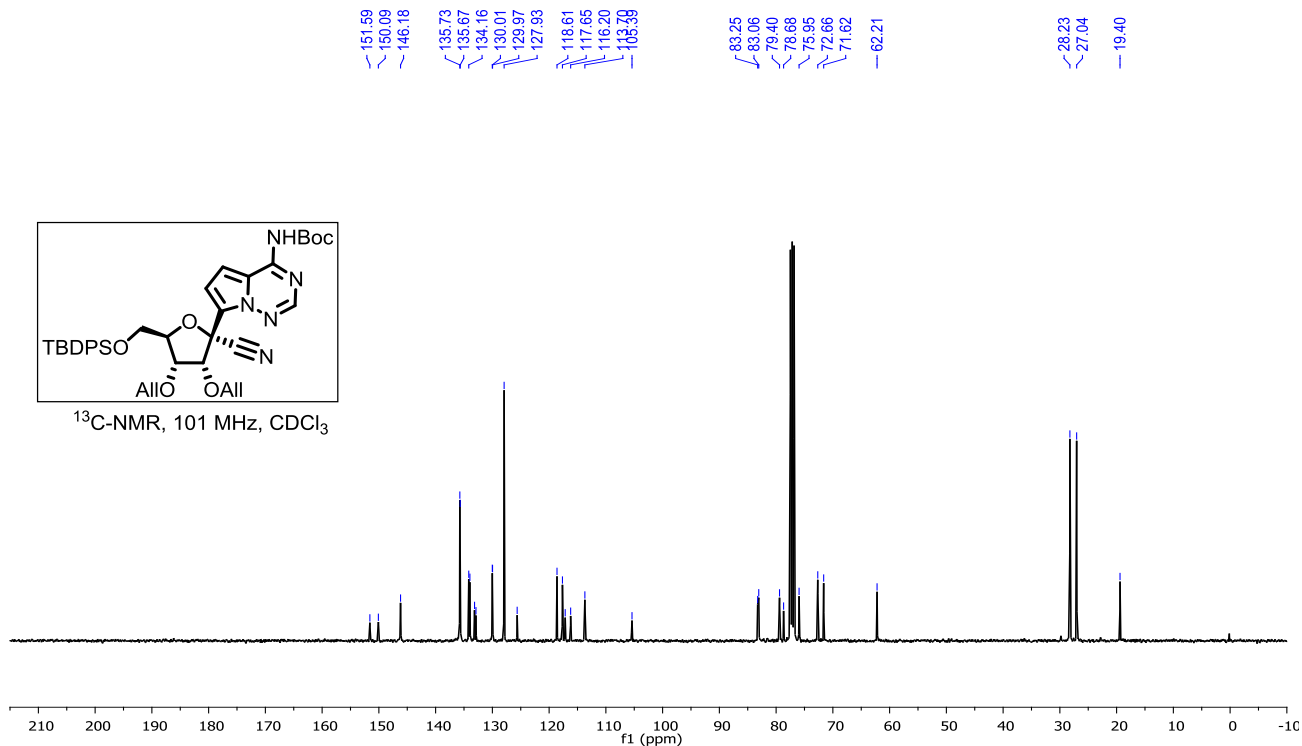

**(2R,3R,4R,5R)-2-(4-Aminopyrrolo[2,1-f][1,2,4]triazin-7-yl)-5-(hydroxymethyl)-3,4-bis(((E)-prop-1-en-1-yl)oxy)tetrahydrofuran-2-carbonitrile (19):**

7.92, 7.16, 7.15, 6.71, 6.70, 6.00, 5.99, 5.96, 5.93, 5.39, 4.95, 4.94, 4.88, 4.86, 4.83, 4.52, 4.36, 4.35, 4.34, 4.33, 4.31, 4.31, 4.30, 4.30, 4.19, 4.18, 4.17, 4.17, 4.15, 4.15, 4.14, 3.94, 3.94, 3.92, 3.92, 3.89, 3.89, 3.88, 3.88, 3.88, 3.87, 3.75, 3.73, 3.71

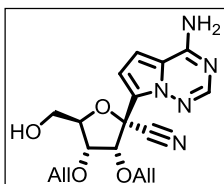

<sup>1</sup>H-NMR, 500 MHz, CDCl<sub>3</sub>

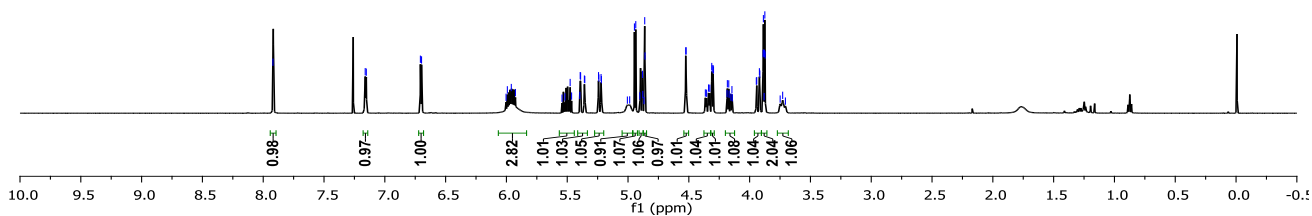

155.93, 147.65, 134.50, 133.40, 123.70, 118.17, 117.63, 117.23, 117.18, 114.98, 100.89, 87.50, 79.91, 79.29, 72.37, 72.05, 63.13

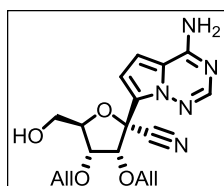

<sup>13</sup>C-NMR, 126 MHz, CDCl<sub>3</sub>

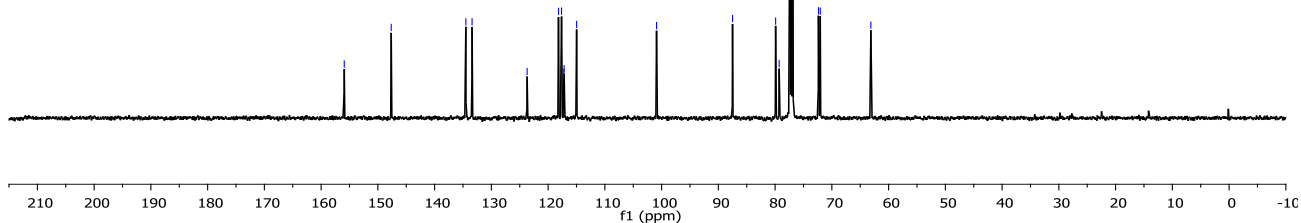

**(2*R*,3*R*,4*R*,5*R*)-2-(4-Aminopyrrolo[2,1-*f*][1,2,4]triazin-7-yl)-5-(hydroxymethyl)-3,4-bis(((*E*)-prop-1-en-1-yl)oxy)tetrahydrofuran-2-carbonitrile (19):**

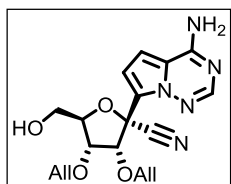

<sup>1</sup>H-NMR, 400 MHz, DMSO-*d*<sub>6</sub>

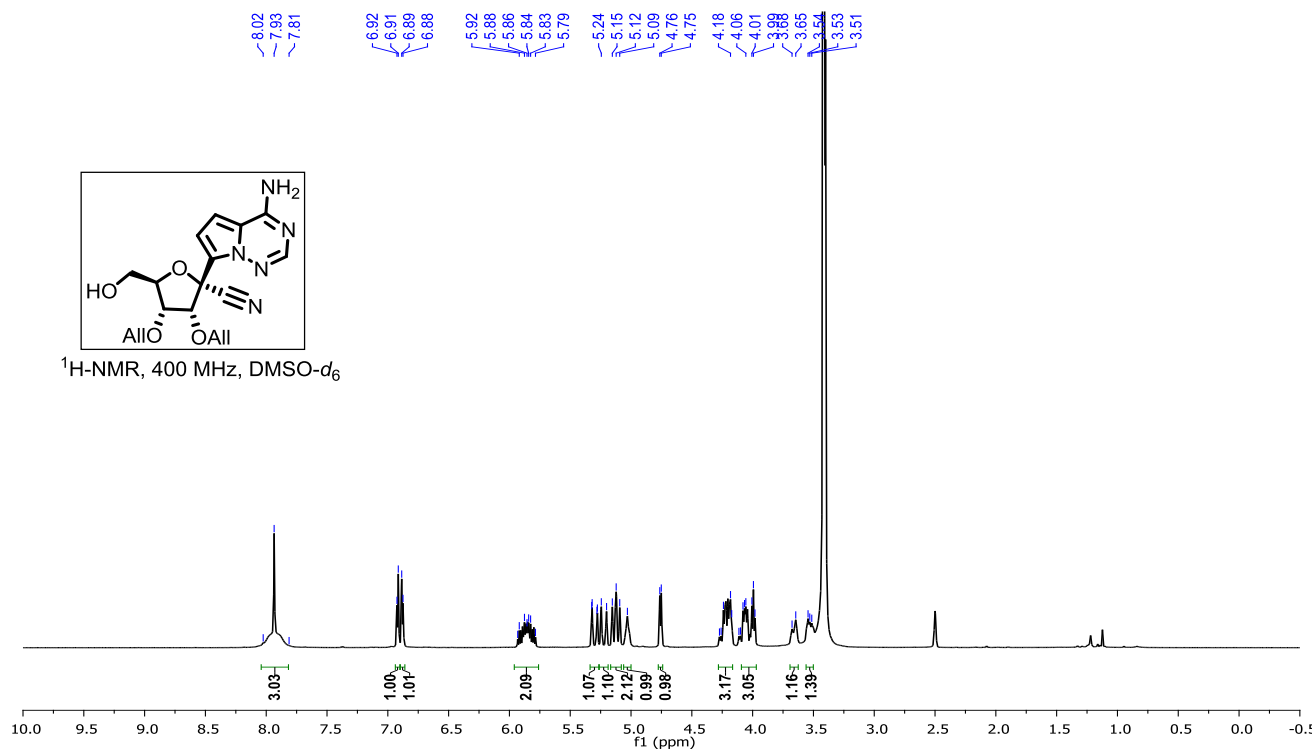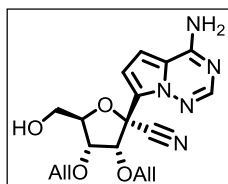

<sup>13</sup>C-NMR, 101 MHz, DMSO-*d*<sub>6</sub>

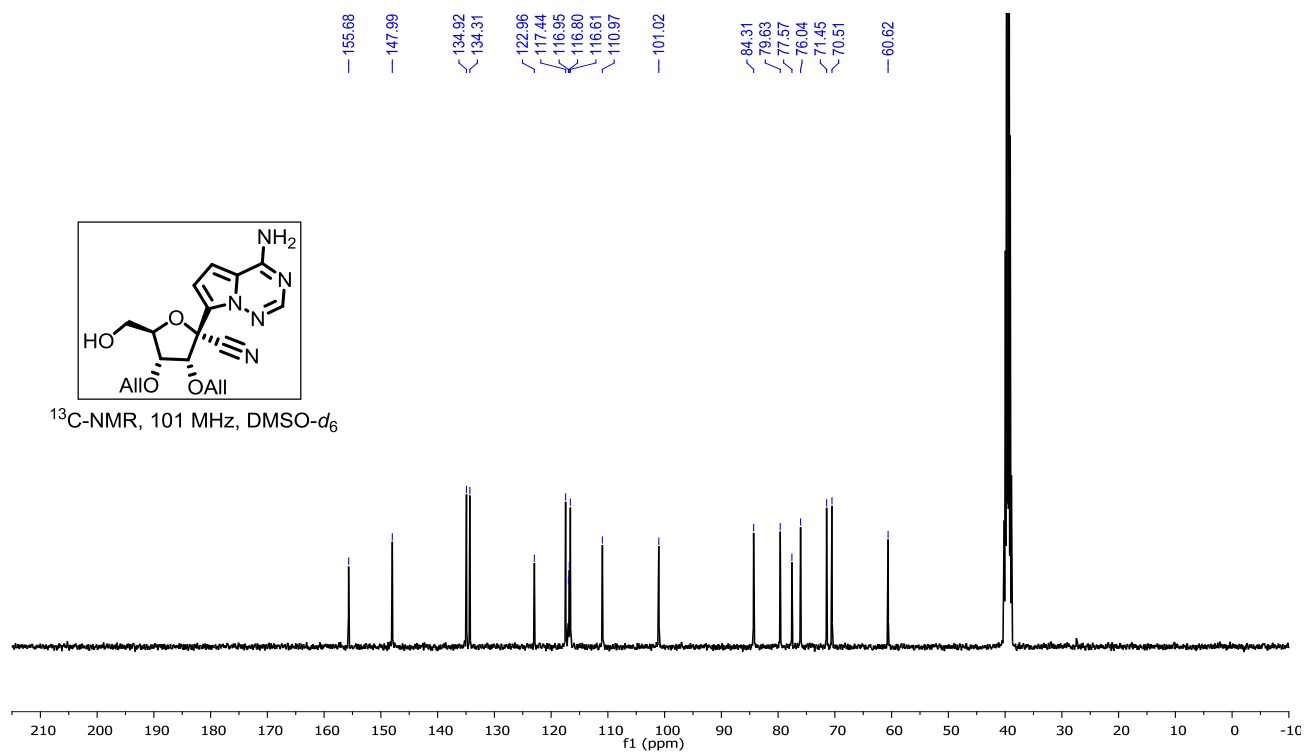

## 2-Ethylbutyl ((S)-(perfluorophenoxy)(phenoxy)phosphoryl)-L-alaninate (20):

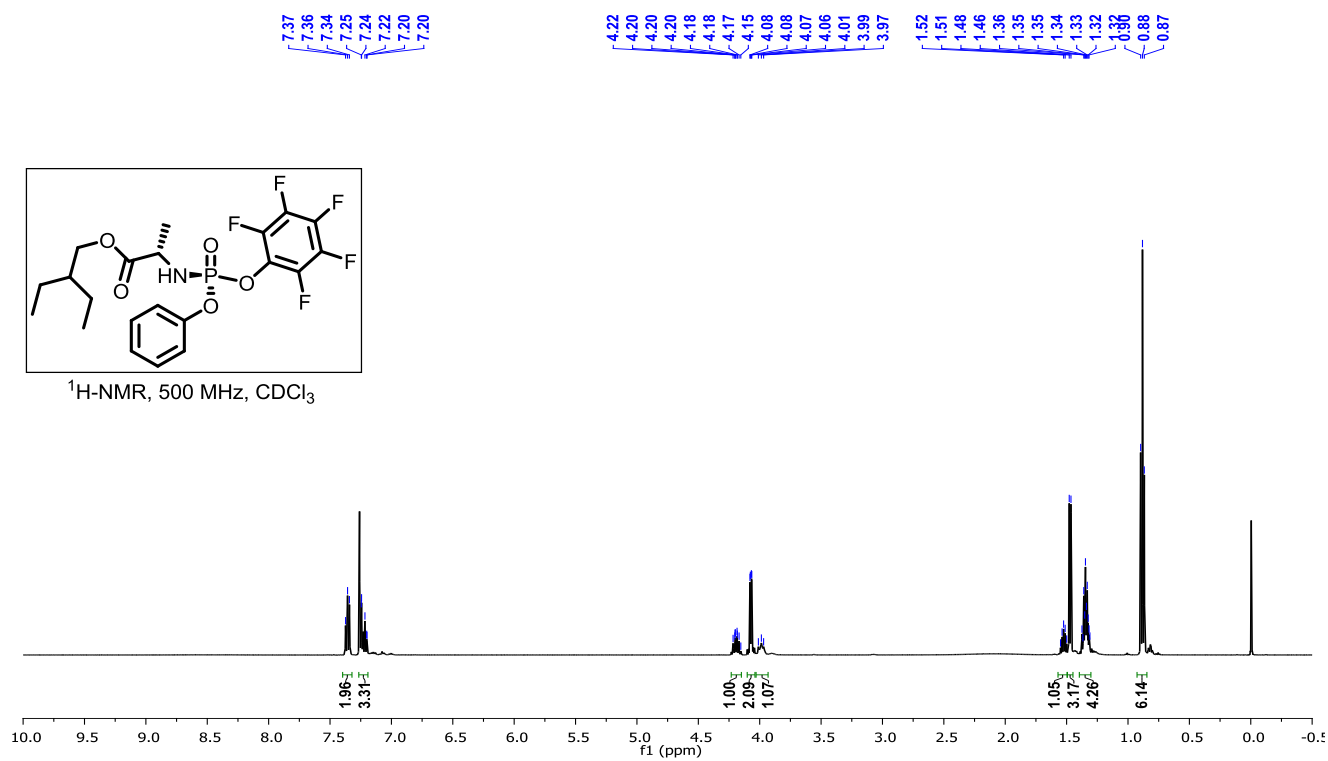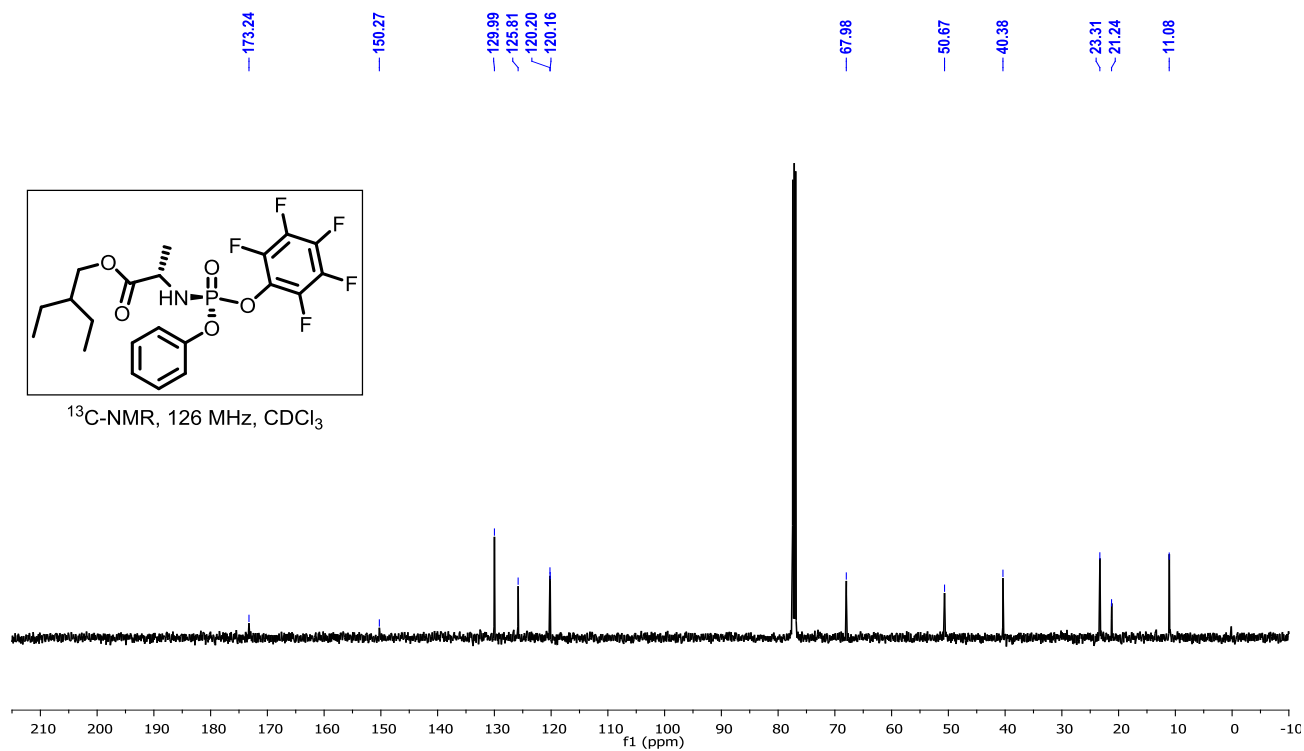

**2-Ethylbutyl ((S)-(perfluorophenoxy)(phenoxy)phosphoryl)-L-alaninate (20):**

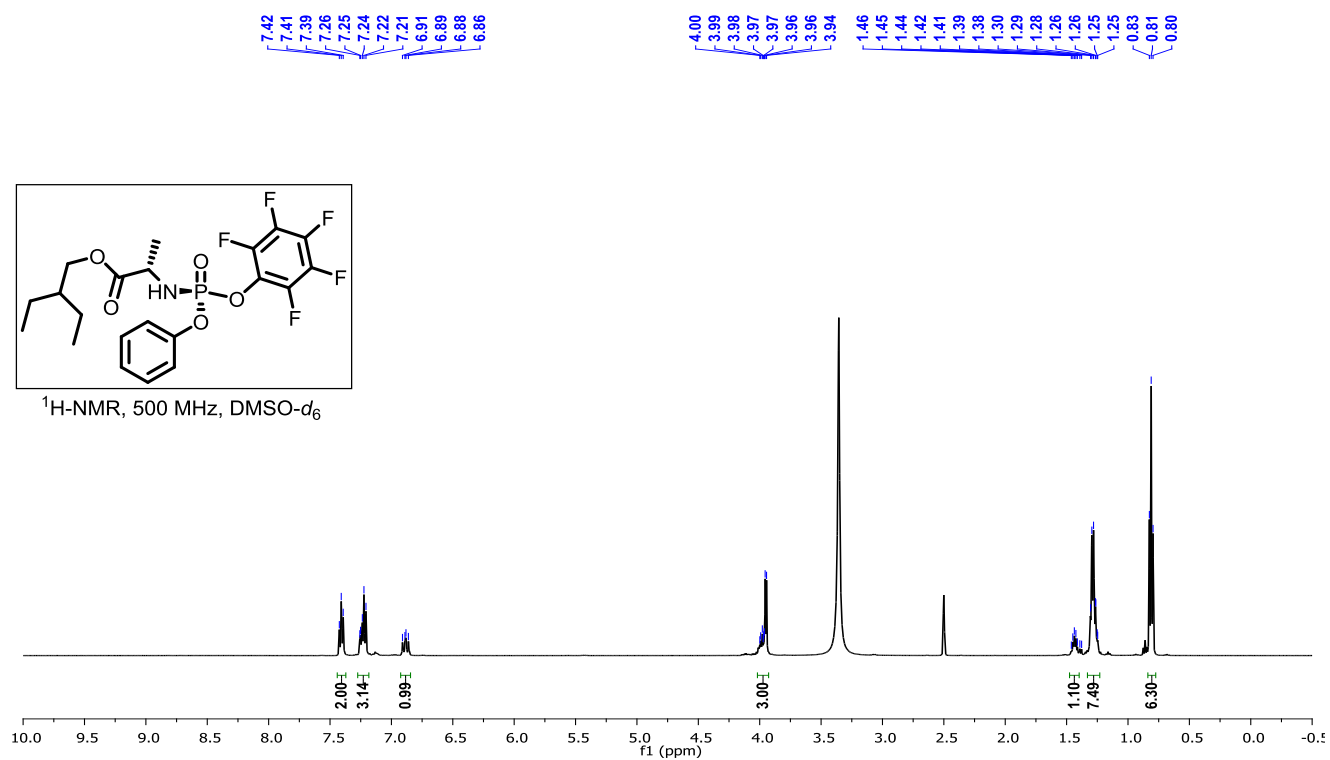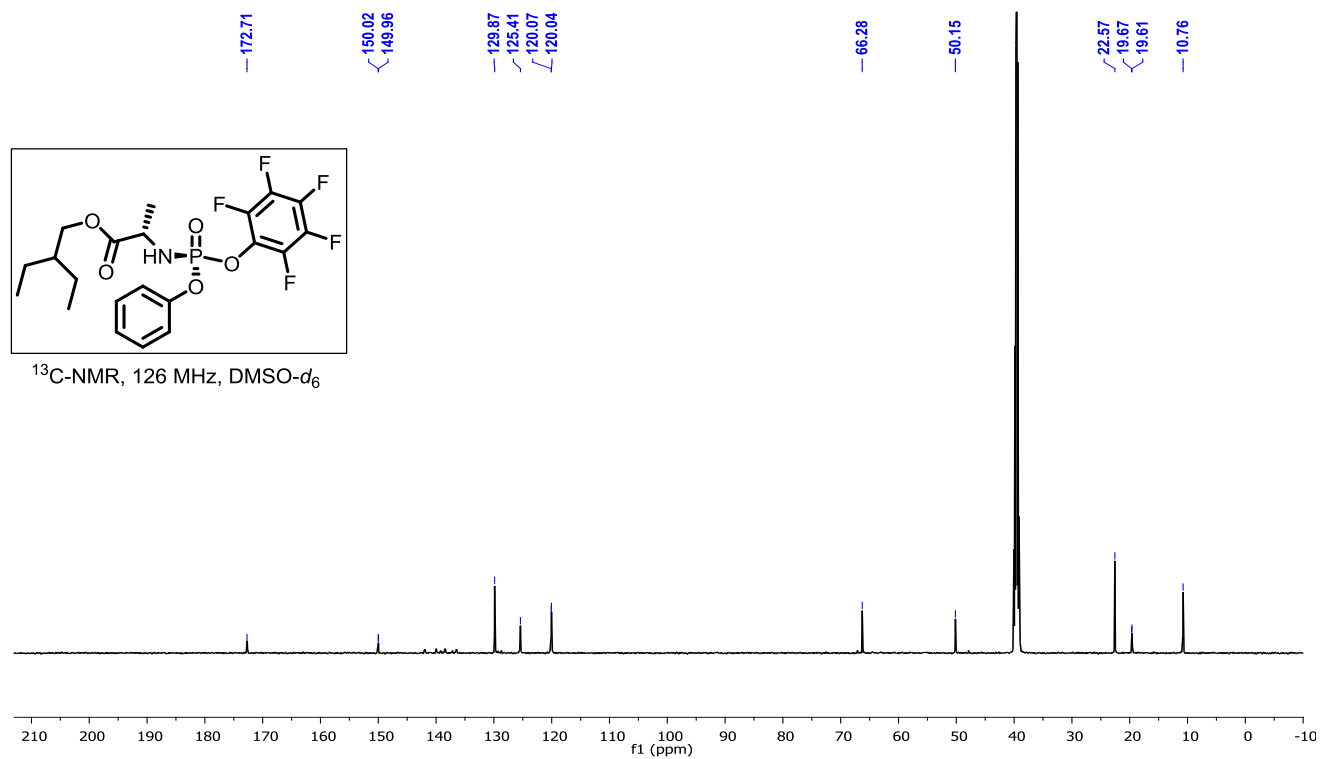

## 2-Ethylbutyl ((S)-(perfluorophenoxy)(phenoxy)phosphoryl)-L-alaninate (20):

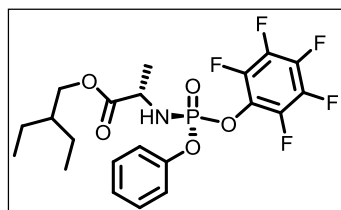

$^{31}\text{P}$ -NMR, 202 MHz,  $\text{CDCl}_3$

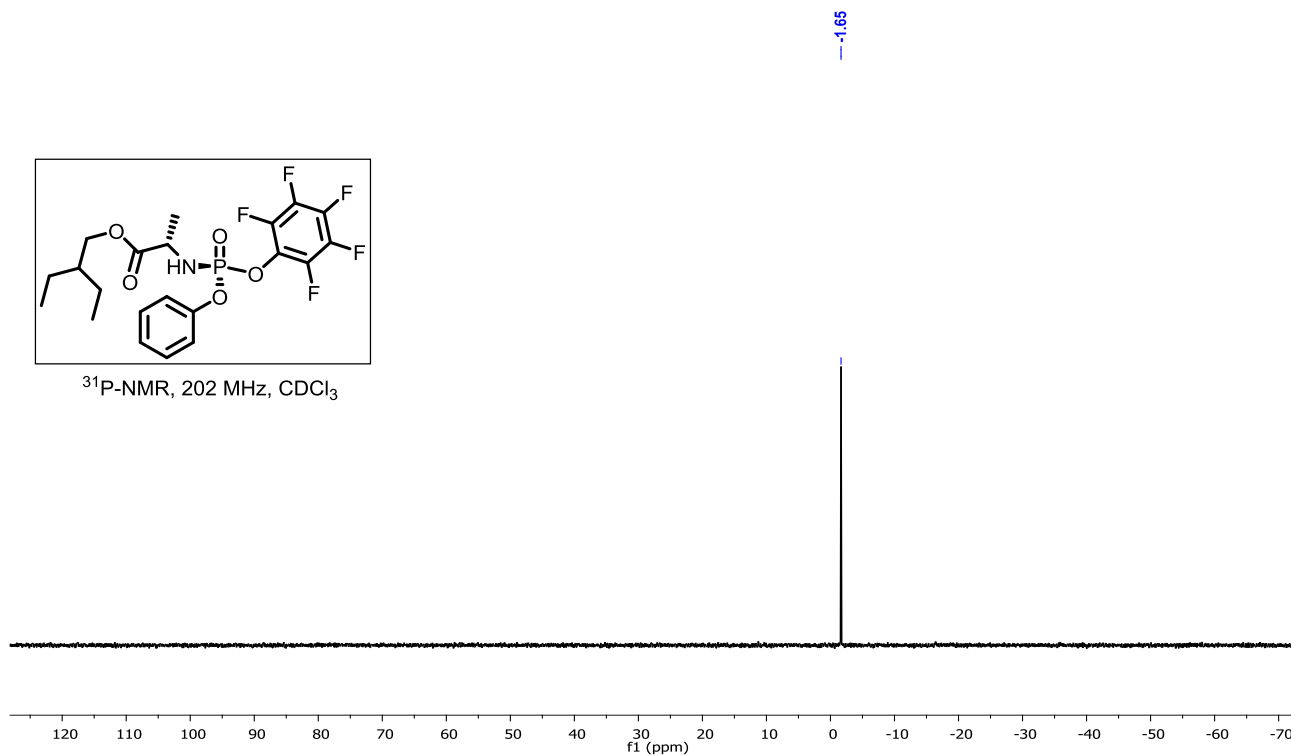

-153.30  
-153.35  
-159.51  
-159.56  
-159.62  
-162.16  
-162.21  
-162.27

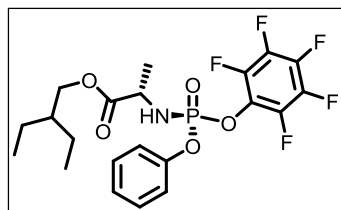

$^{19}\text{F}$ -NMR, 376 MHz,  $\text{CDCl}_3$

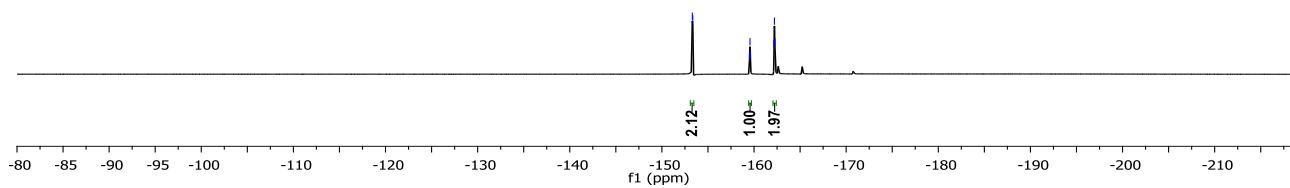



**2-Ethylbutyl ((S)-(((2R,3R,4R,5R)-5-(4-aminopyrrolo[2,1-f][1,2,4]triazin-7-yl)-5-cyano-3,4-bis((E)-prop-1-en-1-yl)oxy)tetrahydrofuran-2-yl)methoxy)(phenoxy)phosphoryl)-L-alaninate (21):**

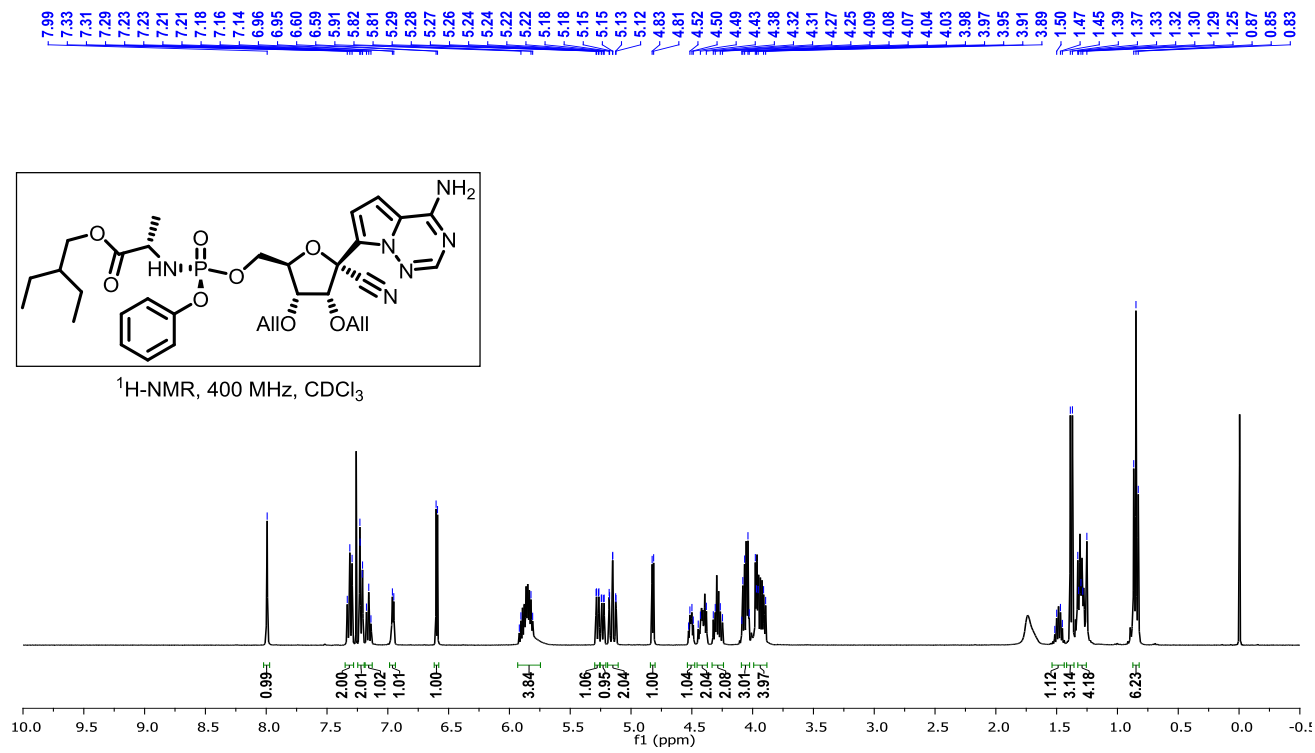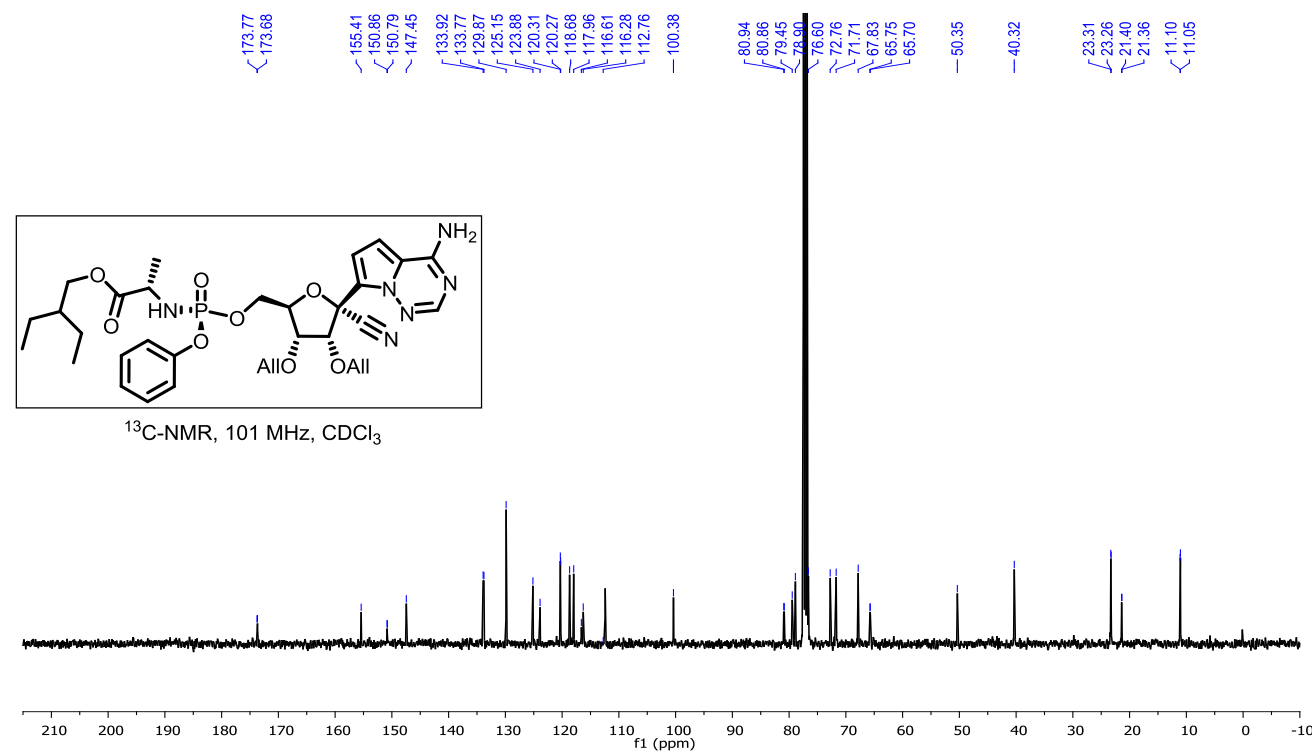

**2-Ethylbutyl ((S)-(((2R,3R,4R,5R)-5-(4-aminopyrrolo[2,1-f][1,2,4]triazin-7-yl)-5-cyano-3,4-bis((E)-prop-1-en-1-yl)oxy)tetrahydrofuran-2-yl)methoxy)(phenoxy)phosphoryl)-L-alaninate (21):**

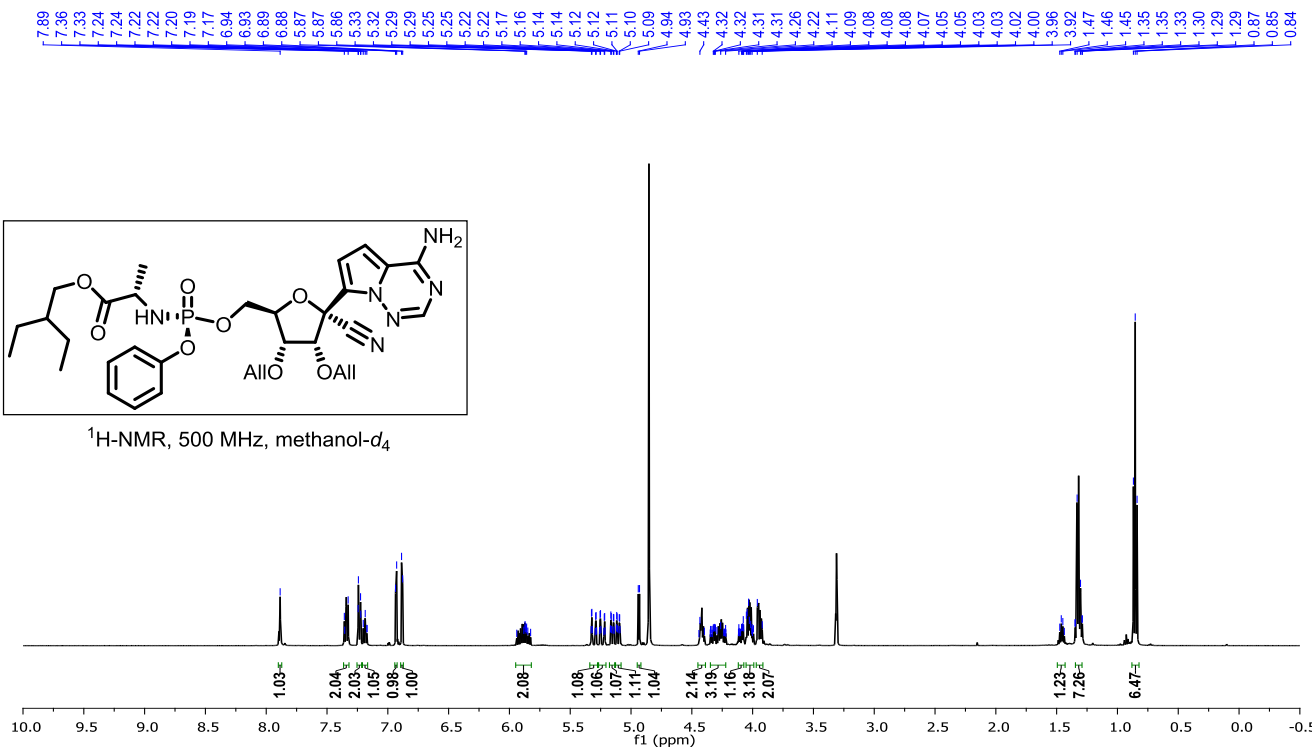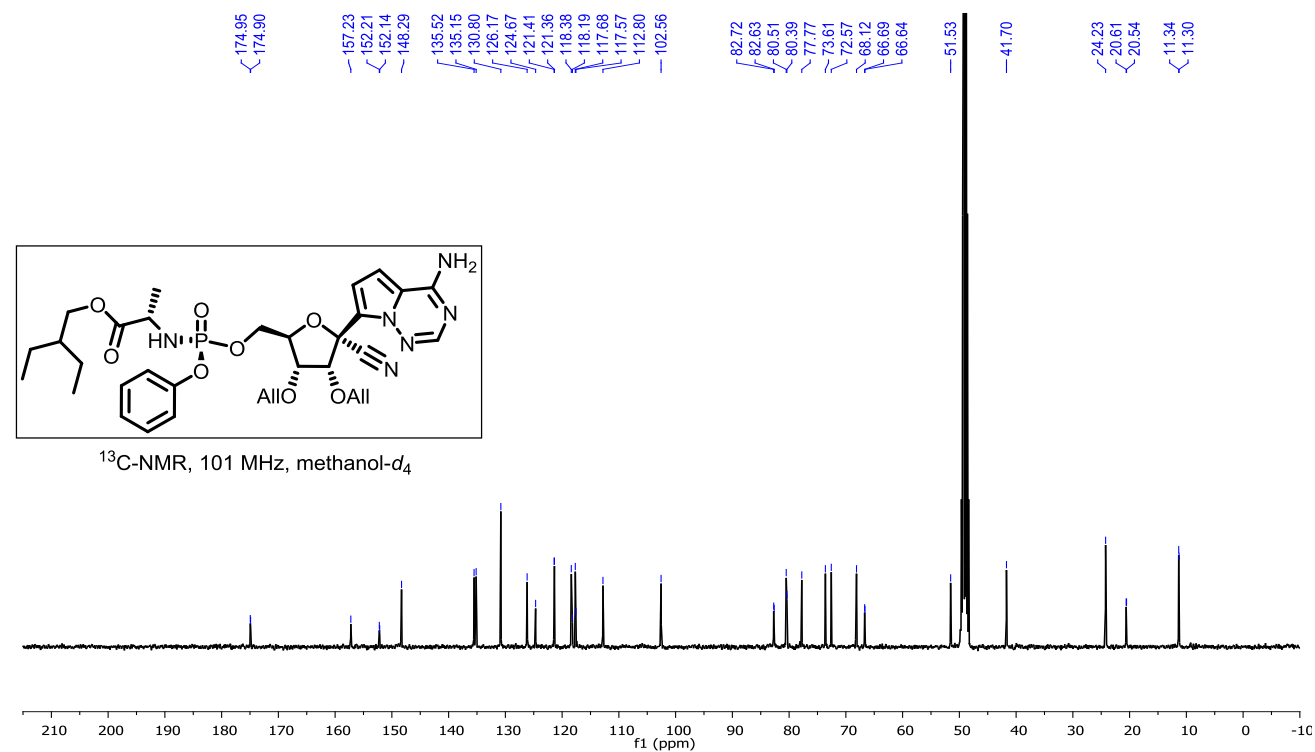

**2-Ethylbutyl ((S)-(((2R,3R,4R,5R)-5-(4-aminopyrrolo[2,1-f][1,2,4]triazin-7-yl)-5-cyano-3,4-bis((E)-prop-1-en-1-yl)oxy)tetrahydrofuran-2-yl)methoxy)(phenoxy)phosphoryl)-L-alaninate (21):**

— 3.49

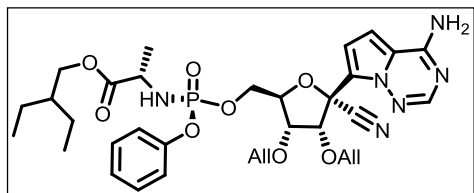

<sup>31</sup>P-NMR, 202 MHz, methanol-*d*<sub>4</sub>

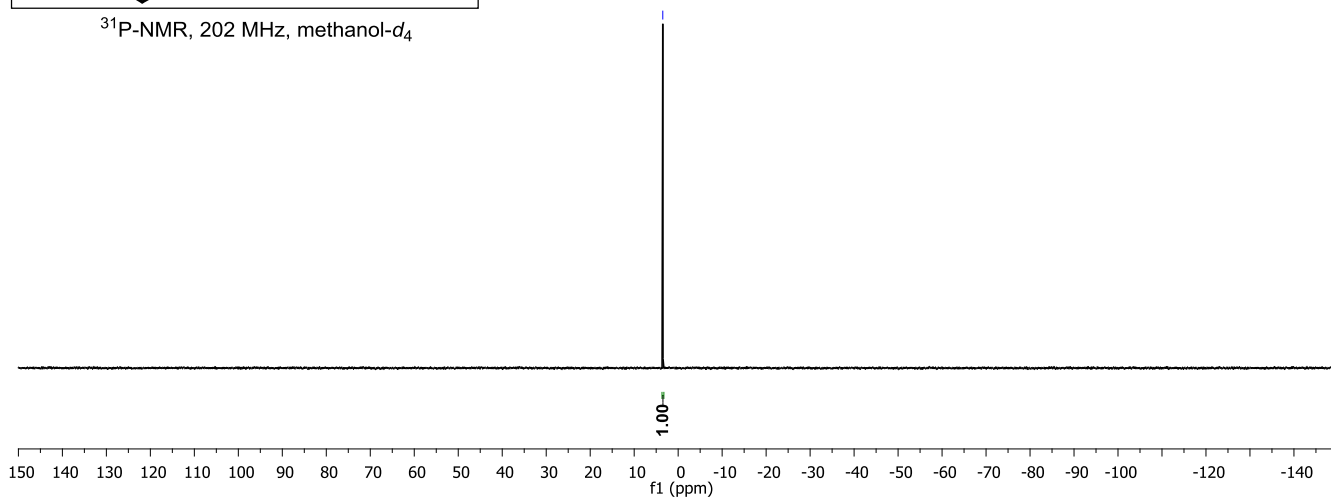

# Remdesivir (1, GS-5734):

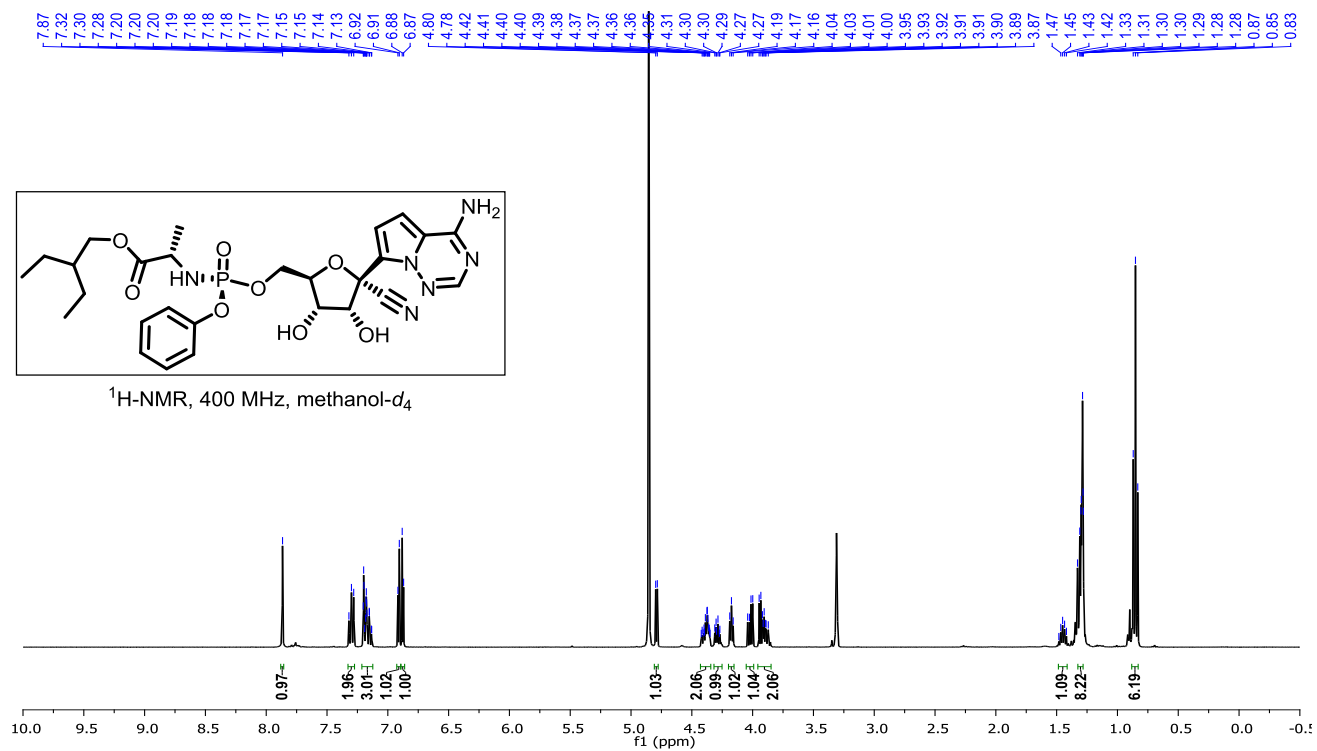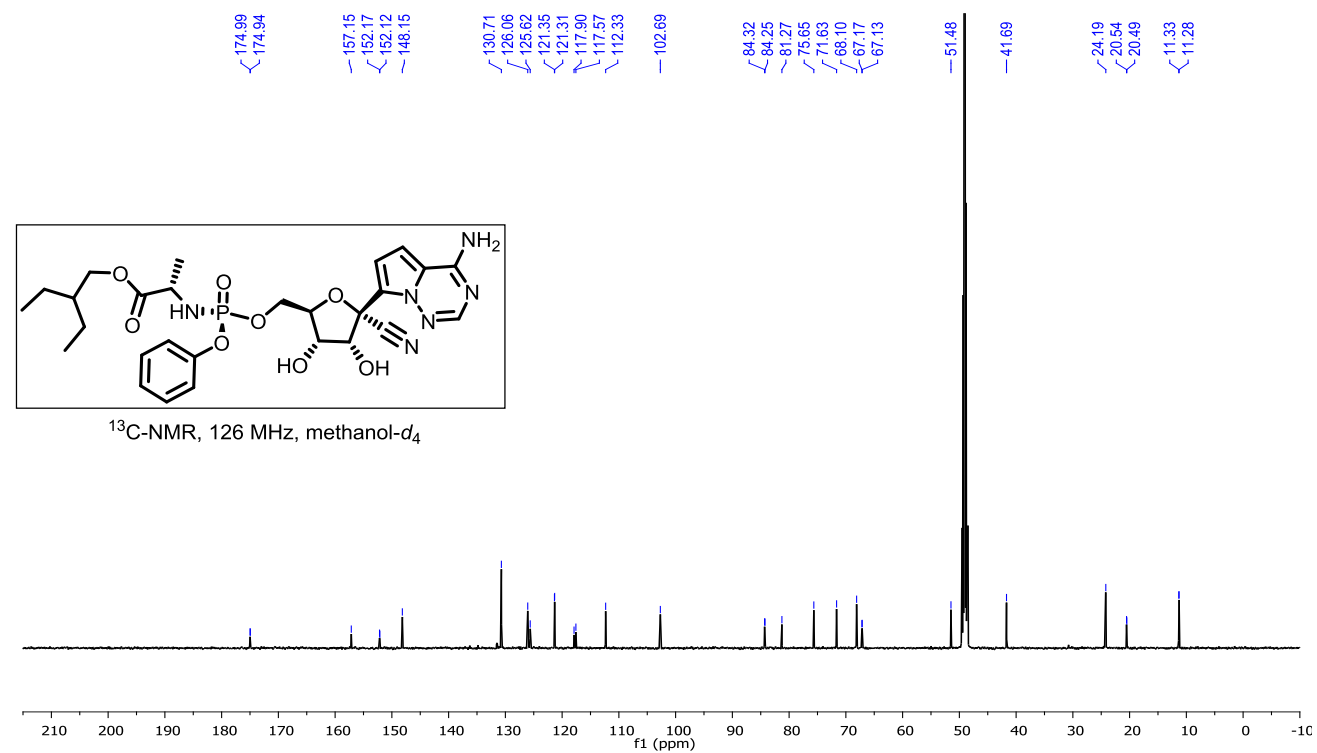

Remdesivir (1, GS-5734):

-3.50

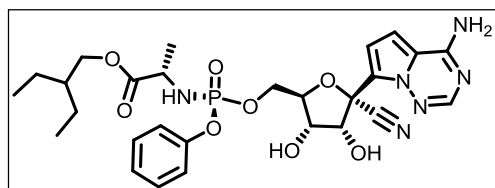

<sup>31</sup>P-NMR, 202 MHz, methanol-d<sub>4</sub>

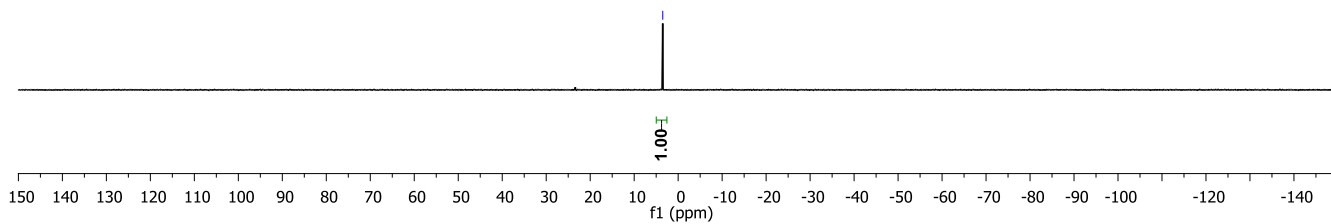

## VI. Comparison of $^1\text{H}$ and $^{13}\text{C}$ NMR spectral data of Remdesivir (1, GS-5734)

(a) Comparison of  $^1\text{H}$  and  $^{13}\text{C}$  NMR spectral data of Remdesivir (1, GS-5734) and previously reported lit.data<sup>6</sup>

Table S1:

| $\delta_{\text{H}}$ (m, J(Hz), xH)<br>(Compound 1,<br><b>GS-5734</b> )<br>methanol- $d_4$ , 400 MHz | $\delta_{\text{H}}$ (m, J(Hz), xH)<br>(Reported lit.)<br>methanol- $d_4$ , 400 MHz | $\delta_{\text{C}}$ (xC)<br>(Compound 1,<br><b>GS-5734</b> )<br>methanol- $d_4$ , 126 MHz | $\delta_{\text{C}}$ (xC)<br>(Reported lit.)<br>methanol- $d_4$ , 100 MHz |
|-----------------------------------------------------------------------------------------------------|------------------------------------------------------------------------------------|-------------------------------------------------------------------------------------------|--------------------------------------------------------------------------|
| 7.87 (s, 1H)                                                                                        | 7.86 (s, 1H)                                                                       | 174.99                                                                                    | 174.98                                                                   |
| 7.33 – 7.26 (m, 2H)                                                                                 | 7.33 – 7.26 (m, 2H)                                                                | 174.94                                                                                    | 174.92                                                                   |
| 7.21 – 7.12 (m, 3H)                                                                                 | 7.21 – 7.12 (m, 3H)                                                                | 157.15                                                                                    | 157.18                                                                   |
| 6.91 (d, $J = 4.6$ Hz, 1H)                                                                          | 6.91 (d, $J = 4.6$ Hz, 1H)                                                         | 152.17                                                                                    | 152.14                                                                   |
| 6.88 (d, $J = 4.6$ Hz, 1H)                                                                          | 6.87 (d, $J = 4.6$ Hz, 1H)                                                         | 152.12                                                                                    | 152.07                                                                   |
| 4.79 (d, $J = 5.4$ Hz, 1H)                                                                          | 4.79 (d, $J = 5.4$ Hz, 1H)                                                         | 148.15                                                                                    | 148.27                                                                   |
| 4.43 – 4.34 (m, 2 H)                                                                                | 4.43 – 4.34 (m, 2 H)                                                               | 130.71                                                                                    | 130.68                                                                   |
| 4.28 (ddd, $J = 10.3, 5.9, 4.2$ Hz, 1H)                                                             | 4.28 (ddd, $J = 10.3, 5.9, 4.2$ Hz, 1H)                                            | 126.06                                                                                    | 126.04                                                                   |
| 4.17 (t, $J = 5.6$ Hz, 1H)                                                                          | 4.17 (t, $J = 5.6$ Hz, 1H)                                                         | 125.62                                                                                    | 125.51                                                                   |
| 4.02 (dd, $J = 10.9, 5.8$ Hz 1H)                                                                    | 4.02 (dd, $J = 10.9, 5.8$ Hz 1H)                                                   | 121.35                                                                                    | 121.33                                                                   |
| 3.96 – 3.85 (m, 2H)                                                                                 | 3.96 – 3.85 (m, 2H)                                                                | 121.31                                                                                    | 121.28                                                                   |
| 1.49 – 1.41 (m, 1H)                                                                                 | 1.49 – 1.41 (m, 1H)                                                                | 117.90                                                                                    | 117.90                                                                   |
| 1.35 – 1.27 (m, 8H)                                                                                 | 1.35 – 1.27 (m, 8H)                                                                | 117.57                                                                                    | 117.58                                                                   |
| 0.85 (t, $J = 7.5$ Hz, 6H)                                                                          | 0.85 (t, $J = 7.4$ Hz, 6H)                                                         | 112.33                                                                                    | 112.29                                                                   |
|                                                                                                     |                                                                                    | 102.69                                                                                    | 102.60                                                                   |
|                                                                                                     |                                                                                    | 84.32                                                                                     | 84.31                                                                    |
|                                                                                                     |                                                                                    | 84.25                                                                                     | 84.22                                                                    |
|                                                                                                     |                                                                                    | 81.27                                                                                     | 81.26                                                                    |
|                                                                                                     |                                                                                    | 75.65                                                                                     | 75.63                                                                    |
|                                                                                                     |                                                                                    | 71.63                                                                                     | 71.63                                                                    |
|                                                                                                     |                                                                                    | 68.10                                                                                     | 68.10                                                                    |
|                                                                                                     |                                                                                    | 67.17                                                                                     | 67.17                                                                    |
|                                                                                                     |                                                                                    | 67.13                                                                                     | 67.12                                                                    |
|                                                                                                     |                                                                                    | 51.48                                                                                     | 51.46                                                                    |
|                                                                                                     |                                                                                    | 41.69                                                                                     | 41.65                                                                    |
|                                                                                                     |                                                                                    | 24.19                                                                                     | 24.19                                                                    |
|                                                                                                     |                                                                                    | 20.54                                                                                     | 20.56                                                                    |
|                                                                                                     |                                                                                    | 20.49                                                                                     | 20.50                                                                    |
|                                                                                                     |                                                                                    | 11.33                                                                                     | 11.33                                                                    |
|                                                                                                     |                                                                                    | 11.28                                                                                     | 11.28                                                                    |

## VII. References

1. S. Jingkang, L. Jia, C. Yuele, Z. Yubo, X. Bing, L. Tongchao, R. Huanming, X. Wuchen, S. Mingbo, H. Xiaobei, W. Yujie, and X. Wei, Patent CN109748943 (2019).
2. M. G. B. Drew, J. Mann and A. Thomas, *J. Chem. Soc. Perkin Trans. 1* (1986) 2279–2285.
3. S. Jingkang, L. Jia, C. Yuele, Z. Yubo, X. Bing, L. Tongchao, R. Huanming, X. Wuchen, S. Mingbo, H. Xiaobei, W. Yujie, and X. Wei, Patent CN109748943 (2019).
4. (a) B. K. Chun, M. O. Clarke, E. Doerffler, H. C. Hui, R. Jordan, R. L. Mackman, A. S. Ray and D. Siegel, Patent WO2016/69826 (2016). (b) M. O. Clarke, R. Jordan, R. L. Mackman, A. S. Ray and D. Siegel, Patent WO2017/184668 (2017). (c) O. Moukha-Chafiq, M. J. Suto, J. Liu and R. Boohaker Patent WO2020/247633 (2020).
5. M. Wang, L. Zhang, X. Huo, Z. Zhang, Q. Yuan, P. Li, J. Chen, Y. Zou, Z. Wu and W. Zhang, *Angew. Chem., Int. Ed.* 59 (2020) 20814–20819.
6. T. K. Warren, R. Jordan, M. K. Lo, A. S. Ray, R. L. Mackman, V. Soloveva, D. Siegel, M. Perron, R. Bannister, H. C. Hui, N. Larson, R. Strickley, J. Wells, K. S. Stuthman, S. A. V. Tongeren, N. L. Garza, G. Donnelly, A. C. Shurtleff, C. J. Retterer, D. Gharaibeh, R. Zamani, T. Kenny, B. P. Eaton, E. Grimes, L. S. Welch, L. Gomba, C. L. Wilhelmsen, D. K. Nichols, J. E. Nuss, E. R. Nagle, J. R. Kugelman, G. Palacios, E. Doerffler, S. Neville, E. Carra, M. O. Clarke, L. Zhang, W. Lew, B. Ross, Q. Wang, K. Chun, L. Wolfe, D. Babusis, Y. Park, K. M. Stray, I. Trancheva, J. Y. Feng, O. Barauskas, Y. Xu, P. Wong, M. R. Braun, M. Flint, L. K. McMullan, S. -S. Chen, R. Fearn, S. Swaminathan, D. L. Mayers, C. F. Spiropoulou, W. A. Lee, S. T. Nichol, T. Cihlar and S. Bavari, *Nature*. 531 (2016) 381–385.
